# Supplementary material for: Comprehensive genome-wide analysis of genetic loci and candidate genes associated with litter traits in purebred Berkshire pigs of Korea
Source: PubMed Central journal article supplement (PMC11366516; doi:10.5713/ab.24.0046), 2024-08-18
Supplement: ab-24-0046-Supplementary-Fig-3.pdf [file ab-24-0046-Supplementary-Fig-3.pdf]

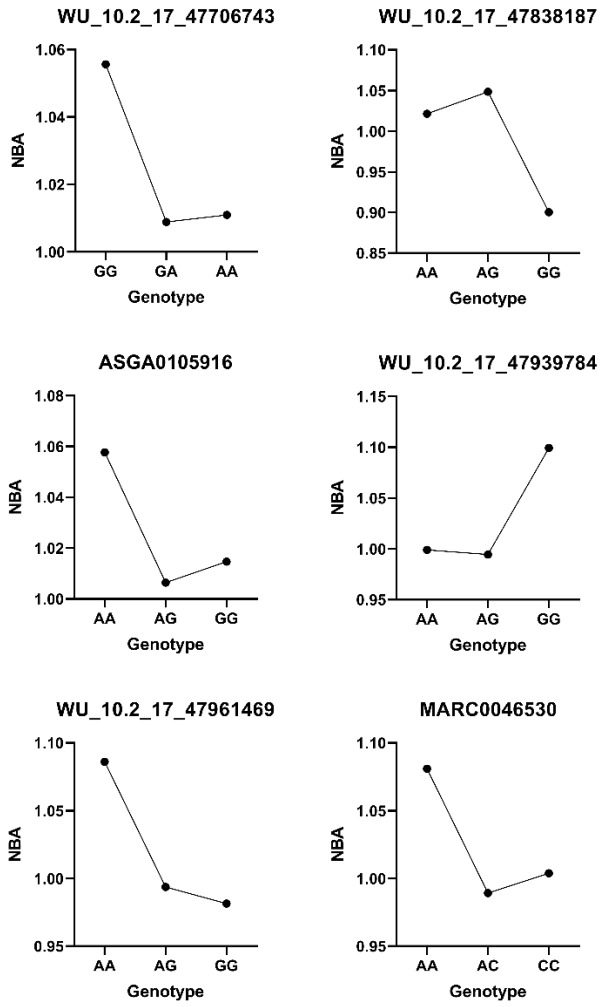

29

30

31

Fig S3. The phenotypic change according to the genotype of the markers that showed the highest genetic variance explained in TNS
