# Supplementary material for: Comprehensive genome-wide analysis of genetic loci and candidate genes associated with litter traits in purebred Berkshire pigs of Korea
Source: PubMed Central journal article supplement (PMC11366516; doi:10.5713/ab.24.0046), 2024-08-18
Supplement: ab-24-0046-Supplementary-Table-1.pdf [file ab-24-0046-Supplementary-Table-1.pdf]

# SUPPLEMENTARY MATERIAL

**Supplementary Table S1** Basic statistics for litter traits of Korean Berkshire pigs.

**Supplementary Table S2** Summary of GWAS with the significant 0.52 Mb windows that were associated with the total number of piglets born (TNB) in Korean Berkshire pigs.

**Supplementary Table S3** Summary of GWAS with the significant 0.52 Mb windows that were associated with the number of piglets born alive (NBA) in Korean Berkshire pigs

**Supplementary Table S4** Summary of GWAS with the significant 0.52 Mb windows that were associated with the total number of stillbirths (TNS) in Korean Berkshire pigs

**Supplementary Figure S1** The phenotypic change according to the genotype of the markers that showed the highest genetic variance explained in TNB

**Supplementary Figure S2** The phenotypic change according to the genotype of the markers that showed the highest genetic variance explained in NBA

**Supplementary Figure S3** The phenotypic change according to the genotype of the markers that showed the highest genetic variance explained in TNS

**Table S1** Basic statistics for litter traits of Korean Berkshire pigs.

| Traits <sup>1</sup> | No. of records | Mean | SD <sup>2</sup> | Minimum | Maximum |
|---------------------|----------------|------|-----------------|---------|---------|
| TNB                 | 11,228         | 8.95 | 2.69            | 2       | 22      |
| NBA                 | 11,228         | 7.92 | 2.53            | 0       | 18      |
| TNS                 | 11,228         | 1.03 | 1.26            | 0       | 14      |

<sup>1</sup>total number of piglets born (TNB), the number of piglets born alive (NBA), total number of stillbirths (TNS); <sup>2</sup>SD: Standard deviation

**Table S2** Summary of GWAS with the significant 0.52 Mb windows that were associated with the total number of piglets born (TNB) in Korean Berkshire pigs.

| SNP                | rsid         | chr | Position | Variant    | SNP effect   | gVar(%) <sup>1</sup> | Gene annotation <sup>2</sup>         |
|--------------------|--------------|-----|----------|------------|--------------|----------------------|--------------------------------------|
| H3GA0013593        | rs80954318   | 4   | 95331300 | intron     | 6.98128E-09  | 1.8                  | IL6R                                 |
| H3GA0013596        | rs80909580   | 4   | 95369253 | intron     | 2.08063E-10  | 1.9                  | IL6R                                 |
| ALGA0026990        | rs81382415   | 4   | 95430762 | synonymous | 1.67196E-06  | 1.9                  | ATP8B2                               |
| MARC0105246        | rs1110880965 | 4   | 95470082 | intron     | -8.30154E-08 | 1.9                  | HAX1                                 |
| ALGA0026994        | rs1109800220 | 4   | 95485304 | intron     | 4.04223E-06  | 1.9                  | UBAP2L                               |
| ASGA0021116        | rs81382427   | 4   | 95509695 | intron     | 4.37379E-15  | 1.9                  | UBAP2L                               |
| DIAS0000761        | rs346114470  | 4   | 95533483 | missense   | -2.879E-10   | 1.9                  | CFAP141                              |
| ASGA0021118        | rs81382433   | 4   | 95557016 | intron     | 1.57495E-05  | 1.9                  | ENSSSCG00000006556                   |
| MARC0027501        | rs80977488   | 4   | 95601325 | intron     | 0.003482441  | 1.9                  | NUP210L                              |
| ALGA0027004        | rs3471618871 | 4   | 95669839 | intron     | -0.03380295  | 1.9                  | NUP210L                              |
| WU_10.2_5_11843429 | rs336985696  | 5   | 12081150 | intergenic | -4.7398E-10  | 2.8                  | ssc-mir-9790 (52632), TIMP3 (161431) |
