# Supplementary material for: Comprehensive genome-wide analysis of genetic loci and candidate genes associated with litter traits in purebred Berkshire pigs of Korea
Source: PubMed Central journal article supplement (PMC11366516; doi:10.5713/ab.24.0046), 2024-08-18
Supplement: ab-24-0046-Supplementary-Table-2.pdf [file ab-24-0046-Supplementary-Table-2.pdf]

# SUPPLEMENTARY MATERIAL

**Supplementary Table S1** Basic statistics for litter traits of Korean Berkshire pigs.

**Supplementary Table S2** Summary of GWAS with the significant 0.52 Mb windows that were associated with the total number of piglets born (TNB) in Korean Berkshire pigs.

**Supplementary Table S3** Summary of GWAS with the significant 0.52 Mb windows that were associated with the number of piglets born alive (NBA) in Korean Berkshire pigs

**Supplementary Table S4** Summary of GWAS with the significant 0.52 Mb windows that were associated with the total number of stillbirths (TNS) in Korean Berkshire pigs

**Supplementary Figure S1** The phenotypic change according to the genotype of the markers that showed the highest genetic variance explained in TNB

**Supplementary Figure S2** The phenotypic change according to the genotype of the markers that showed the highest genetic variance explained in NBA

**Supplementary Figure S3** The phenotypic change according to the genotype of the markers that showed the highest genetic variance explained in TNS

**Table S1** Basic statistics for litter traits of Korean Berkshire pigs.

| Traits <sup>1</sup> | No. of records | Mean | SD <sup>2</sup> | Minimum | Maximum |
|---------------------|----------------|------|-----------------|---------|---------|
| TNB                 | 11,228         | 8.95 | 2.69            | 2       | 22      |
| NBA                 | 11,228         | 7.92 | 2.53            | 0       | 18      |
| TNS                 | 11,228         | 1.03 | 1.26            | 0       | 14      |

<sup>1</sup>total number of piglets born (TNB), the number of piglets born alive (NBA), total number of stillbirths (TNS); <sup>2</sup>SD: Standard deviation

**Table S2** Summary of GWAS with the significant 0.52 Mb windows that were associated with the total number of piglets born (TNB) in Korean Berkshire pigs.

| SNP                | rsid         | chr | Position | Variant    | SNP effect   | gVar(%) <sup>1</sup> | Gene annotation <sup>2</sup>         |
|--------------------|--------------|-----|----------|------------|--------------|----------------------|--------------------------------------|
| H3GA0013593        | rs80954318   | 4   | 95331300 | intron     | 6.98128E-09  | 1.8                  | IL6R                                 |
| H3GA0013596        | rs80909580   | 4   | 95369253 | intron     | 2.08063E-10  | 1.9                  | IL6R                                 |
| ALGA0026990        | rs81382415   | 4   | 95430762 | synonymous | 1.67196E-06  | 1.9                  | ATP8B2                               |
| MARC0105246        | rs1110880965 | 4   | 95470082 | intron     | -8.30154E-08 | 1.9                  | HAX1                                 |
| ALGA0026994        | rs1109800220 | 4   | 95485304 | intron     | 4.04223E-06  | 1.9                  | UBAP2L                               |
| ASGA0021116        | rs81382427   | 4   | 95509695 | intron     | 4.37379E-15  | 1.9                  | UBAP2L                               |
| DIAS0000761        | rs346114470  | 4   | 95533483 | missense   | -2.879E-10   | 1.9                  | CFAP141                              |
| ASGA0021118        | rs81382433   | 4   | 95557016 | intron     | 1.57495E-05  | 1.9                  | ENSSSCG00000006556                   |
| MARC0027501        | rs80977488   | 4   | 95601325 | intron     | 0.003482441  | 1.9                  | NUP210L                              |
| ALGA0027004        | rs3471618871 | 4   | 95669839 | intron     | -0.03380295  | 1.9                  | NUP210L                              |
| WU_10.2_5_11843429 | rs336985696  | 5   | 12081150 | intergenic | -4.7398E-10  | 2.8                  | ssc-mir-9790 (52632), TIMP3 (161431) |

|                    |             |   |          |             |              |     |                                       |
|--------------------|-------------|---|----------|-------------|--------------|-----|---------------------------------------|
| WU_10.2_5_11812749 | rs318311504 | 5 | 12113071 | intergenic  | -9.03172E-10 | 2.8 | ssc-mir-9790 (84553), TIMP3 (129510)  |
| WU_10.2_5_11786856 | rs335156436 | 5 | 12138941 | intergenic  | -2.85702E-10 | 2.8 | ssc-mir-9790 (110423), TIMP3 (103640) |
| WU_10.2_5_11768030 | rs331901219 | 5 | 12157755 | intergenic  | -0.000132706 | 2.8 | ssc-mir-9790 (129237), TIMP3 (84826)  |
| ALGA0030559        | rs80953600  | 5 | 12158272 | intergenic  | -0.005433828 | 2.8 | ssc-mir-9790 (129754), TIMP3 (84309)  |
| WU_10.2_5_11963093 | rs339691066 | 5 | 12186789 | 3_prime_UTR | 3.01442E-07  | 2.8 | TIMP3                                 |
| INRA0018475        | rs329285273 | 5 | 12204810 | intron      | -1.94785E-08 | 2.8 | TIMP3                                 |
| H3GA0015679        | rs80924517  | 5 | 12226072 | intron      | 7.67983E-07  | 2.8 | TIMP3                                 |
| WU_10.2_5_2468497  | rs335297714 | 5 | 12265777 | intergenic  | -0.008796267 | 4.3 | TIMP3 (79959), SYN3 (234299)          |
| WU_10.2_5_88710499 | rs326845351 | 5 | 12267943 | intergenic  | -1.68881E-08 | 4.1 | TIMP3 (82125), SYN3 (232133)          |
| ASGA0024487        | rs81387465  | 5 | 12306038 | intergenic  | -0.000161242 | 4.2 | TIMP3 (120220), SYN3 (194038)         |
| WU_10.2_5_12166660 | rs339872670 | 5 | 12372257 | intergenic  | 3.83899E-05  | 4.2 | TIMP3 (186439), SYN3 (127819)         |
| ALGA0030566        | rs81387478  | 5 | 12398727 | intergenic  | -1.69982E-08 | 4.2 | TIMP3 (212909), SYN3 (101349)         |
| ASGA0024488        | rs81387482  | 5 | 12452062 | intergenic  | -6.96834E-09 | 4.2 | TIMP3 (266244), SYN3 (48014)          |
| WU_10.2_5_12259315 | rs342151864 | 5 | 12473396 | upstream    | 0.000179405  | 4.2 | TIMP3 (287578), SYN3 (26680)          |
| H3GA0015682        | rs80849107  | 5 | 12487593 | intron      | -1.60238E-08 | 4.2 | SYN3                                  |
| INRA0018490        | rs324200582 | 5 | 12510020 | intron      | -7.69021E-08 | 4.2 | FBXO7                                 |
| H3GA0015686        | rs80795165  | 5 | 12544917 | intron      | -8.24148E-05 | 4.2 | BPIFC                                 |
| ASGA0024492        | rs80989679  | 5 | 12567885 | intron      | -0.04491719  | 4.2 | BPIFC                                 |
| ASGA0024492        | rs80989679  | 5 | 12567885 | intron      | -0.04491719  | 4.2 | BPIFC (25619), BPIFC (11069)          |
| DIAS0003292        | rs80815903  | 5 | 12596918 | synonymous  | -0.08753973  | 2.4 | RTCB                                  |
| DIAS0003292        | rs80815903  | 5 | 12596918 | synonymous  | -0.08753973  | 2.4 | RTCB (16624), RTCB (16934)            |
| WU_10.2_5_77458038 | rs324971369 | 5 | 74645799 | intron      | -6.57516E-05 | 1.6 | ADAMTS20                              |
| ASGA0026341        | rs80859829  | 5 | 74704457 | intergenic  | 6.40983E-08  | 1.6 | ADAMTS20 (201341), PUS7L (129971)     |
| ALGA0032936        | rs80891783  | 5 | 74721790 | intergenic  | -3.34132E-07 | 1.6 | ADAMTS20 (218674), PUS7L (112638)     |
| H3GA0016866        | rs80841456  | 5 | 74743829 | intergenic  | 3.50036E-10  | 1.6 | ADAMTS20 (240713), PUS7L (90599)      |
| H3GA0016864        | rs80886325  | 5 | 74761472 | intergenic  | 3.0488E-12   | 1.6 | ADAMTS20 (258356), PUS7L (72956)      |
| ALGA0032933        | rs80873221  | 5 | 74783135 | intergenic  | 3.83405E-13  | 1.6 | ADAMTS20 (280019), PUS7L (51293)      |

|                     |             |   |           |                            |              |     |                                                           |
|---------------------|-------------|---|-----------|----------------------------|--------------|-----|-----------------------------------------------------------|
| DIAS0004288         | rs80898295  | 5 | 74806259  | missense                   | 3.11627E-08  | 1.6 | PUS7L                                                     |
| WU_10.2_5_77683641  | rs326683948 | 5 | 74871138  | intron                     | 6.13455E-14  | 1.6 | TWF1                                                      |
| ALGA0112619         | rs81341240  | 5 | 74891309  | intron                     | 2.30876E-12  | 1.6 | TWF1                                                      |
| ALGA0117169         | rs81346881  | 5 | 74924814  | intron                     | 0.000252938  | 1.6 | TMEM117                                                   |
| ALGA0032946         | rs80897897  | 5 | 74981466  | intron                     | -0.02990466  | 1.6 | TMEM117                                                   |
| ALGA0037340         | rs81393036  | 6 | 153576745 | upstream                   | 4.72502E-06  | 2   | ENSSSCG00000061831 (7479),<br>ENSSSCG00000052447 (11120)  |
| ALGA0037343         | rs81393043  | 6 | 153597317 | non_coding_transcript_exon | -5.85011E-05 | 2   | ENSSSCG00000056712                                        |
| ALGA0037343         | rs81393043  | 6 | 153597317 | non_coding_transcript_exon | -5.85011E-05 | 2   | ENSSSCG00000056712 (4312),<br>ENSSSCG00000056712 (4272)   |
| WU_10.2_6_141178397 | rs332119045 | 6 | 153633196 | non_coding_transcript_exon | -0.005316871 | 2   | ENSSSCG00000053758                                        |
| ASGA0029872         | rs81393079  | 6 | 153644923 | intergenic                 | -5.62839E-07 | 1.8 | ENSSSCG00000053758 (14870),<br>ENSSSCG00000056388 (39679) |
| WU_10.2_6_141192870 | rs338944012 | 6 | 153648450 | intergenic                 | -0.000905295 | 1.8 | ENSSSCG00000053758 (18397),<br>ENSSSCG00000056388 (36152) |
| H3GA0019067         | rs81393069  | 6 | 153668879 | intergenic                 | -0.001184369 | 1.8 | ENSSSCG00000053758 (38826),<br>ENSSSCG00000056388 (15723) |
| MARC0057158         | rs81246878  | 6 | 153675300 | upstream                   | -3.65967E-05 | 1.8 | ENSSSCG00000053758 (45247),<br>ENSSSCG00000056388 (9302)  |
| ALGA0037350         | rs81393063  | 6 | 153702154 | intergenic                 | -0.00024595  | 1.8 | JUN (16472), MYSM1 (93381)                                |
| WU_10.2_6_141248398 | rs319529181 | 6 | 153703701 | intergenic                 | 0.02180048   | 1.8 | JUN (18019), MYSM1 (91834)                                |
| ALGA0037357         | rs80892726  | 6 | 153740906 | intergenic                 | -6.71541E-10 | 1.6 | JUN (55224), MYSM1 (54629)                                |
| ASGA0029874         | rs81393087  | 6 | 153754973 | upstream                   | 2.37258E-09  | 1.6 | JUN (69291), MYSM1 (40562)                                |
| WU_10.2_6_141309639 | rs334967097 | 6 | 153767092 | intron                     | 1.71885E-06  | 1.6 | MYSM1                                                     |
| WU_10.2_6_141383152 | rs328746765 | 6 | 153789144 | intron                     | -0.001186055 | 2   | MYSM1                                                     |
| WU_10.2_6_141383152 | rs328746765 | 6 | 153789144 | intron                     | -0.001186055 | 2   | MYSM1 (32962), MYSM1 (6391)                               |
| MARC0033192         | rs81227426  | 6 | 153823337 | intergenic                 | 3.61809E-06  | 2.1 | MYSM1 (67155), TACSTD2 (38155)                            |
| ASGA0099800         | rs81320394  | 6 | 153833562 | intergenic                 | -0.005551801 | 2.1 | MYSM1 (77380), TACSTD2 (27930)                            |
| ALGA0108422         | rs81336326  | 6 | 153848968 | intergenic                 | 5.25214E-05  | 2.1 | MYSM1 (92786), TACSTD2 (12524)                            |
| WU_10.2_6_141454842 | rs320246646 | 6 | 153860889 | 3_prime_UTR                | 1.89666E-06  | 2.1 | TACSTD2                                                   |
| WU_10.2_6_141499839 | rs333017624 | 6 | 153905462 | intron                     | -0.03525992  | 2.1 | OMA1                                                      |
| ASGA0030100         | rs81393717  | 6 | 160220231 | intron                     | -3.60366E-05 | 1.8 | RAB3B                                                     |

|                     |             |   |           |             |              |     |                                                          |
|---------------------|-------------|---|-----------|-------------|--------------|-----|----------------------------------------------------------|
| H3GA0019195         | rs81393714  | 6 | 160251796 | 3_prime_UTR | -0.000169383 | 1.8 | RAB3B                                                    |
| ASGA0030114         | rs81393734  | 6 | 160327199 | 3_prime_UTR | -7.75316E-08 | 1.8 | NRDC                                                     |
| ASGA0030114         | rs81393734  | 6 | 160327199 | 3_prime_UTR | -7.75316E-08 | 1.8 | ENSSSCG00000058239                                       |
| MARC0029221         | rs81224030  | 6 | 160361778 | intron      | -1.44451E-06 | 1.8 | NRDC                                                     |
| MARC0029221         | rs81224030  | 6 | 160361778 | intron      | -1.44451E-06 | 1.8 | MIR761 (25622), NRDC (26724)                             |
| WU_10.2_6_148093098 | rs338350400 | 6 | 160390005 | intron      | 2.57091E-06  | 2.4 | OSBPL9                                                   |
| WU_10.2_6_148093098 | rs338350400 | 6 | 160390005 | intron      | 2.57091E-06  | 2.4 | OSBPL9 (1328), OSBPL9 (176364)                           |
| WU_10.2_6_148132890 | rs321816399 | 6 | 160429795 | intron      | -0.001360494 | 2.4 | OSBPL9                                                   |
| WU_10.2_6_148158088 | rs333191369 | 6 | 160454991 | intron      | 7.54074E-05  | 2.3 | OSBPL9                                                   |
| WU_10.2_6_148177389 | rs343360489 | 6 | 160474293 | intron      | 0.000815511  | 2.6 | OSBPL9                                                   |
| WU_10.2_6_148209459 | rs332227876 | 6 | 160506365 | intron      | 0.002343421  | 2.6 | OSBPL9                                                   |
| H3GA0019199         | rs81393740  | 6 | 160535498 | intron      | 0.005565753  | 2.5 | OSBPL9                                                   |
| MARC0057560         | rs81247226  | 6 | 160565896 | intron      | 0.009697298  | 2.3 | OSBPL9                                                   |
| H3GA0019200         | rs81393756  | 6 | 160587182 | intergenic  | 0.02606615   | 2   | OSBPL9 (198505), ENSSSCG00000059473 (33459)              |
| ASGA0040427         | rs81405706  | 8 | 135274760 | 3_prime_UTR | 3.66211E-06  | 1.8 | ENSSSCG00000009240                                       |
| ASGA0040427         | rs81405706  | 8 | 135274760 | 3_prime_UTR | 3.66211E-06  | 1.8 | ENSSSCG00000009240 (24685),<br>ENSSSCG00000009240 (4285) |
| ALGA0050145         | rs81405710  | 8 | 135285532 | intron      | 2.07845E-05  | 1.8 | COPS4                                                    |
| WU_10.2_8_144693654 | rs345777825 | 8 | 135398502 | intron      | 1.11798E-11  | 1.8 | THAP9                                                    |
| ALGA0117619         | rs81347425  | 8 | 135427306 | intron      | 3.2426E-06   | 1.8 | SEC31A                                                   |
| ALGA0117619         | rs81347425  | 8 | 135427306 | intron      | 3.2426E-06   | 1.8 | SEC31A (903), SEC31A (67815)                             |
| 8_144744932         | rs328673214 | 8 | 135449779 | intron      | 4.53708E-06  | 1.8 | SEC31A                                                   |
| WU_10.2_8_144771629 | rs345296578 | 8 | 135476476 | intron      | 4.26343E-06  | 1.8 | SEC31A                                                   |
| WU_10.2_8_144771629 | rs345296578 | 8 | 135476476 | intron      | 4.26343E-06  | 1.8 | SEC31A (50073), SEC31A (18645)                           |
| WU_10.2_8_144847860 | rs334436239 | 8 | 135487158 | intron      | 4.41681E-06  | 1.8 | SEC31A                                                   |
| H3GA0052926         | rs81336088  | 8 | 135491186 | intron      | 5.67874E-06  | 1.8 | SEC31A                                                   |
| WU_10.2_8_144898378 | rs319261432 | 8 | 135537530 | intron      | 0.000005701  | 1.8 | SCD5                                                     |
| WU_10.2_8_144927686 | rs320260240 | 8 | 135566615 | intron      | 3.33286E-05  | 1.8 | SCD5                                                     |

|                     |              |    |           |            |              |     |                                                           |
|---------------------|--------------|----|-----------|------------|--------------|-----|-----------------------------------------------------------|
| ALGA0121391         | rs81328969   | 8  | 135591552 | intron     | 1.12855E-09  | 1.8 | SCD5                                                      |
| H3GA0054370         | rs81328785   | 8  | 135604963 | intron     | 4.76261E-12  | 1.8 | SCD5                                                      |
| DRGA0017418         | rs81339189   | 8  | 135607348 | intron     | 4.557E-11    | 1.8 | SCD5                                                      |
| ALGA0109193         | rs81337243   | 8  | 135629399 | intron     | 4.61342E-11  | 1.8 | SCD5                                                      |
| WU_10.2_8_145018548 | rs338821365  | 8  | 135648560 | downstream | 2.26782E-10  | 1.8 | ENSSSCG00000052420 (9892),<br>ENSSSCG00000060705 (5196)   |
| ASGA0082238         | rs81330273   | 8  | 135665981 | intergenic | 2.84127E-06  | 1.8 | ENSSSCG00000060705 (16178), U6 (54432)                    |
| ASGA0105760         | rs81305967   | 8  | 135668712 | intergenic | 5.18215E-06  | 1.8 | ENSSSCG00000060705 (18909), U6 (51701)                    |
| MARC0065298         | rs81253423   | 8  | 135689152 | intron     | 1.08384E-14  | 1.8 | TMEM150C                                                  |
| ALGA0105830         | rs339198846  | 8  | 135699278 | intron     | -0.001191077 | 1.8 | TMEM150C                                                  |
| ASGA0092699         | rs81311486   | 8  | 135719143 | intron     | 3.08671E-05  | 1.8 | TMEM150C                                                  |
| ASGA0102835         | rs81476910   | 8  | 135728719 | intron     | 2.98738E-05  | 1.8 | TMEM150C                                                  |
| MARC0059365         | rs81249045   | 8  | 135751832 | intron     | 5.39231E-10  | 1.8 | TMEM150C                                                  |
| ASGA0104181         | rs81304104   | 8  | 135768303 | downstream | 0.0323693    | 1.8 | U6 (47996), ENOPH1 (34085)                                |
| 10007668            | rs81218852   | 10 | 19391507  | synonymous | -8.40999E-08 | 2.4 | TLR5                                                      |
| H3GA0029533         | rs81421707   | 10 | 19409070  | intron     | 4.0851E-15   | 2.4 | TLR5                                                      |
| CASI0009135         | rs345690779  | 10 | 19411706  | upstream   | -2.77253E-07 | 2.4 | TLR5 (24040), SUSD4 (140134)                              |
| ALGA0057679         | rs81421752   | 10 | 19512266  | intron     | 0.01312272   | 2.4 | SUSD4                                                     |
| WU_10.2_10_22034045 | rs344136854  | 10 | 19535825  | intron     | 0.003421729  | 2   | SUSD4                                                     |
| ASGA0046986         | rs81421775   | 10 | 19572163  | intergenic | -1.79565E-09 | 2   | SUSD4 (150598), ENSSSCG00000010888 (14231)                |
| WU_10.2_10_22164312 | rs327591080  | 10 | 19604335  | intergenic | -0.000983042 | 2   | ENSSSCG00000010888 (19173),<br>ENSSSCG00000054070 (54172) |
| WU_10.2_10_22123753 | rs342419073  | 10 | 19645727  | intergenic | -3.20411E-09 | 2   | ENSSSCG00000010888 (60565),<br>ENSSSCG00000054070 (12780) |
| MARC0010568         | rs3474528732 | 10 | 19715055  | intron     | -4.20413E-06 | 2   | CAPN8                                                     |
| ASGA0095681         | rs81315152   | 10 | 19753037  | intergenic | -6.7154E-08  | 2   | CAPN8 (87182), CAPN2 (67209)                              |
| MARC0105091         | rs3471802107 | 10 | 19780059  | intron     | 0.02827226   | 2   | CAPN2                                                     |
| ASGA0084454         | rs81343376   | 12 | 6971812   | intergenic | -1.93931E-07 | 3   | RPL38 (86910), ENSSSCG00000046071 (647627)                |
| MARC0075255         | rs81260438   | 12 | 6982421   | intergenic | 4.32251E-08  | 3   | RPL38 (97519), ENSSSCG00000046071 (637018)                |

|                    |             |    |          |                   |              |     |                                             |
|--------------------|-------------|----|----------|-------------------|--------------|-----|---------------------------------------------|
| M1GA0026980        | rs81323860  | 12 | 6995769  | intergenic        | 5.14487E-09  | 3   | RPL38 (110867), ENSSSCG00000046071 (623670) |
| ALGA0103381        | rs81478115  | 12 | 7006069  | regulatory_region | 2.25299E-08  | 3   | RPL38 (121167), ENSSSCG00000046071 (613370) |
| ASGA0052681        | rs81436220  | 12 | 7048858  | intergenic        | 1.43673E-09  | 3   | RPL38 (163956), ENSSSCG00000046071 (570581) |
| H3GA0033126        | rs81436398  | 12 | 7067951  | intergenic        | -6.35279E-05 | 3   | RPL38 (183049), ENSSSCG00000046071 (551488) |
| MARC0046612        | rs81236893  | 12 | 7080205  | intergenic        | 9.07607E-10  | 3   | RPL38 (195303), ENSSSCG00000046071 (539234) |
| WU_10.2_12_7124825 | rs345556034 | 12 | 7097729  | intergenic        | 1.18092E-06  | 3   | RPL38 (212827), ENSSSCG00000046071 (521710) |
| H3GA0033141        | rs81436583  | 12 | 7127237  | intergenic        | -8.29972E-07 | 3   | RPL38 (242335), ENSSSCG00000046071 (492202) |
| WU_10.2_12_7581758 | rs337597858 | 12 | 7159210  | intergenic        | 0.000181161  | 3   | RPL38 (274308), ENSSSCG00000046071 (460229) |
| H3GA0033163        | rs81436813  | 12 | 7188626  | intergenic        | -2.74889E-05 | 3   | RPL38 (303724), ENSSSCG00000046071 (430813) |
| ALGA0064531        | rs81436950  | 12 | 7225821  | intergenic        | -4.61117E-05 | 3   | RPL38 (340919), ENSSSCG00000046071 (393618) |
| WU_10.2_12_7507773 | rs326956108 | 12 | 7233173  | intergenic        | 9.95661E-05  | 3   | RPL38 (348271), ENSSSCG00000046071 (386266) |
| ASGA0052741        | rs81437044  | 12 | 7247426  | intergenic        | -5.67751E-05 | 3   | RPL38 (362524), ENSSSCG00000046071 (372013) |
| H3GA0033190        | rs81437363  | 12 | 7283888  | intergenic        | 1.06075E-07  | 3   | RPL38 (398986), ENSSSCG00000046071 (335551) |
| DRGA0011569        | rs81300895  | 12 | 7302134  | intergenic        | 1.47152E-10  | 3   | RPL38 (417232), ENSSSCG00000046071 (317305) |
| WU_10.2_12_7398515 | rs81437611  | 12 | 7341458  | intergenic        | 0.001955544  | 3   | RPL38 (456556), ENSSSCG00000046071 (277981) |
| WU_10.2_12_7394362 | rs325492649 | 12 | 7345606  | intergenic        | 0.000310769  | 3   | RPL38 (460704), ENSSSCG00000046071 (273833) |
| WU_10.2_12_7385966 | rs318399475 | 12 | 7354001  | intergenic        | 0.007386912  | 3   | RPL38 (469099), ENSSSCG00000046071 (265438) |
| WU_10.2_12_7634052 | rs338584089 | 12 | 7354388  | intergenic        | 4.17818E-05  | 2.8 | RPL38 (469486), ENSSSCG00000046071 (265051) |
| ASGA0090707        | rs81309086  | 12 | 7371353  | intergenic        | 0.003680733  | 2.8 | RPL38 (486451), ENSSSCG00000046071 (248086) |
| ALGA0105065        | rs81332319  | 12 | 7414272  | intergenic        | 4.69927E-05  | 2.7 | RPL38 (529370), ENSSSCG00000046071 (205167) |
| ASGA0095520        | rs81314949  | 12 | 7418252  | intergenic        | 6.55416E-05  | 2.7 | RPL38 (533350), ENSSSCG00000046071 (201187) |
| ASGA0084859        | rs335889358 | 12 | 7418384  | regulatory_region | 1.30564E-07  | 2.7 | RPL38 (533482), ENSSSCG00000046071 (201055) |
| ASGA0083611        | rs81338615  | 12 | 7420790  | intergenic        | 1.69338E-12  | 2.7 | RPL38 (535888), ENSSSCG00000046071 (198649) |
| H3GA0054071        | rs81325851  | 12 | 7421785  | intergenic        | 0.000198189  | 2.7 | RPL38 (536883), ENSSSCG00000046071 (197654) |
| ASGA0092609        | rs81311382  | 12 | 7458764  | intergenic        | 1.38725E-07  | 2.7 | RPL38 (573862), ENSSSCG00000046071 (160675) |
| M1GA0026970        | rs81323725  | 12 | 7467740  | intergenic        | 0.1205242    | 2.8 | RPL38 (582838), ENSSSCG00000046071 (151699) |
| H3GA0034945        | rs80819532  | 12 | 56869918 | intron            | -1.83799E-13 | 2.1 | ENSSSCG00000038836                          |

17  
18  
19

|                     |             |    |          |            |              |     |                                             |
|---------------------|-------------|----|----------|------------|--------------|-----|---------------------------------------------|
| WU_10.2_12_59543325 | rs341767777 | 12 | 56889946 | intron     | -1.27153E-17 | 2.1 | ENSSSCG00000038836                          |
| M1GA0017107         | rs80838117  | 12 | 56928205 | upstream   | 0.05670551   | 2.1 | ENSSSCG00000038836 (101682), MYOCD (101053) |
| ASGA0079091         | rs81472357  | 18 | 18969597 | downstream | -0.00339301  | 1.8 | UBE2H (149956), ENSSSCG00000049100 (7597)   |
| MARC0113374         | rs81241389  | 18 | 19103011 | intron     | -0.01683279  | 2.2 | NRF1                                        |
| H3GA0053092         | rs81338103  | 18 | 19109295 | intron     | -0.00863991  | 1.6 | NRF1                                        |

<sup>1</sup>percentage of genetic variance explained by 0.52 Mb; <sup>2</sup>gene symbols when intronic or gene symbols (distance) adjacent to the marker when intergenic

**Table S3** Summary of GWAS with the significant 0.52 Mb windows that were associated with the number of piglets born alive (NBA) in Korean Berkshire pigs.

| SNP                | rsid         | chr | Position | Variant    | SNP effect   | gVar(%) <sup>1</sup> | Gene annotation <sup>2</sup>                          |
|--------------------|--------------|-----|----------|------------|--------------|----------------------|-------------------------------------------------------|
| DRGA0002978        | rs81295479   | 2   | 43040842 | intron     | 2.46565E-09  | 2.2                  | SOX6                                                  |
| H3GA0006696        | rs81358422   | 2   | 43102031 | intergenic | 0.000320507  | 2.6                  | SOX6 (648350), ENSSSCG00000052631 (201717)            |
| MARC0000439        | rs81253718   | 2   | 43124329 | intergenic | 1.87211E-13  | 2.6                  | SOX6 (670648), ENSSSCG00000052631 (179419)            |
| ALGA0013525        | rs81358479   | 2   | 43191966 | intergenic | 5.39776E-10  | 2.6                  | SOX6 (738285), ENSSSCG00000052631 (111782)            |
| WU_10.2_2_46373395 | rs326649839  | 2   | 43228658 | intergenic | -1.95202E-08 | 2.6                  | SOX6 (774977), ENSSSCG00000052631 (75090)             |
| ALGA0013529        | rs81358487   | 2   | 43237145 | intergenic | 2.17537E-05  | 2.6                  | SOX6 (783464), ENSSSCG00000052631 (66603)             |
| MARC0041784        | rs81234803   | 2   | 43294192 | downstream | 0.07713712   | 2.6                  | SOX6 (840511), ENSSSCG00000052631 (9556)              |
| M1GA0005682        | rs3476855545 | 4   | 10389912 | intron     | 1.67557E-05  | 1.8                  | ASAP1                                                 |
| M1GA0005684        | rs3473102742 | 4   | 10401987 | intron     | 1.02125E-06  | 1.8                  | ASAP1                                                 |
| M1GA0005687        | rs3472326377 | 4   | 10425479 | intron     | 0.001525907  | 1.8                  | ASAP1                                                 |
| WU_10.2_4_10670656 | rs340305872  | 4   | 10453726 | downstream | 0.001551937  | 1.8                  | ASAP1 (273968), ENSSSCG0000005959 (191547)            |
| ALGA0023112        | rs80797306   | 4   | 10470393 | intergenic | 0.001551937  | 1.8                  | ASAP1 (290635), ENSSSCG0000005959 (174880)            |
| ALGA0023115        | rs80974878   | 4   | 10487214 | intron     | 0.001671321  | 1.8                  | ENSSSCG0000005959                                     |
| H3GA0011950        | rs80866732   | 4   | 10493687 | intron     | 3.41872E-06  | 1.7                  | ENSSSCG0000005959                                     |
| WU_10.2_4_10724127 | rs342564651  | 4   | 10508063 | intron     | 0.001085978  | 1.7                  | ENSSSCG0000005959                                     |
| WU_10.2_4_10724127 | rs342564651  | 4   | 10508063 | intron     | 0.001085978  | 1.7                  | ENSSSCG0000005959 (31931), ENSSSCG0000005959 (137210) |
| DRGA0004454        | rs80876417   | 4   | 10524007 | intron     | 0.000982427  | 1.7                  | ENSSSCG0000005959                                     |
| H3GA0011952        | rs80880654   | 4   | 10547481 | intron     | -0.01713098  | 1.7                  | ENSSSCG0000005959                                     |
