# Supplementary material for: Comprehensive genome-wide analysis of genetic loci and candidate genes associated with litter traits in purebred Berkshire pigs of Korea
Source: PubMed Central journal article supplement (PMC11366516; doi:10.5713/ab.24.0046), 2024-08-18
Supplement: ab-24-0046-Supplementary-Table-3.pdf [file ab-24-0046-Supplementary-Table-3.pdf]

17  
18  
19

|                     |             |    |          |            |              |     |                                             |
|---------------------|-------------|----|----------|------------|--------------|-----|---------------------------------------------|
| WU_10.2_12_59543325 | rs341767777 | 12 | 56889946 | intron     | -1.27153E-17 | 2.1 | ENSSSCG00000038836                          |
| M1GA0017107         | rs80838117  | 12 | 56928205 | upstream   | 0.05670551   | 2.1 | ENSSSCG00000038836 (101682), MYOCD (101053) |
| ASGA0079091         | rs81472357  | 18 | 18969597 | downstream | -0.00339301  | 1.8 | UBE2H (149956), ENSSSCG00000049100 (7597)   |
| MARC0113374         | rs81241389  | 18 | 19103011 | intron     | -0.01683279  | 2.2 | NRF1                                        |
| H3GA0053092         | rs81338103  | 18 | 19109295 | intron     | -0.00863991  | 1.6 | NRF1                                        |

<sup>1</sup>percentage of genetic variance explained by 0.52 Mb; <sup>2</sup>gene symbols when intronic or gene symbols (distance) adjacent to the marker when intergenic

**Table S3** Summary of GWAS with the significant 0.52 Mb windows that were associated with the number of piglets born alive (NBA) in Korean Berkshire pigs.

| SNP                | rsid         | chr | Position | Variant    | SNP effect   | gVar(%) <sup>1</sup> | Gene annotation <sup>2</sup>                          |
|--------------------|--------------|-----|----------|------------|--------------|----------------------|-------------------------------------------------------|
| DRGA0002978        | rs81295479   | 2   | 43040842 | intron     | 2.46565E-09  | 2.2                  | SOX6                                                  |
| H3GA0006696        | rs81358422   | 2   | 43102031 | intergenic | 0.000320507  | 2.6                  | SOX6 (648350), ENSSSCG00000052631 (201717)            |
| MARC0000439        | rs81253718   | 2   | 43124329 | intergenic | 1.87211E-13  | 2.6                  | SOX6 (670648), ENSSSCG00000052631 (179419)            |
| ALGA0013525        | rs81358479   | 2   | 43191966 | intergenic | 5.39776E-10  | 2.6                  | SOX6 (738285), ENSSSCG00000052631 (111782)            |
| WU_10.2_2_46373395 | rs326649839  | 2   | 43228658 | intergenic | -1.95202E-08 | 2.6                  | SOX6 (774977), ENSSSCG00000052631 (75090)             |
| ALGA0013529        | rs81358487   | 2   | 43237145 | intergenic | 2.17537E-05  | 2.6                  | SOX6 (783464), ENSSSCG00000052631 (66603)             |
| MARC0041784        | rs81234803   | 2   | 43294192 | downstream | 0.07713712   | 2.6                  | SOX6 (840511), ENSSSCG00000052631 (9556)              |
| M1GA0005682        | rs3476855545 | 4   | 10389912 | intron     | 1.67557E-05  | 1.8                  | ASAP1                                                 |
| M1GA0005684        | rs3473102742 | 4   | 10401987 | intron     | 1.02125E-06  | 1.8                  | ASAP1                                                 |
| M1GA0005687        | rs3472326377 | 4   | 10425479 | intron     | 0.001525907  | 1.8                  | ASAP1                                                 |
| WU_10.2_4_10670656 | rs340305872  | 4   | 10453726 | downstream | 0.001551937  | 1.8                  | ASAP1 (273968), ENSSSCG0000005959 (191547)            |
| ALGA0023112        | rs80797306   | 4   | 10470393 | intergenic | 0.001551937  | 1.8                  | ASAP1 (290635), ENSSSCG0000005959 (174880)            |
| ALGA0023115        | rs80974878   | 4   | 10487214 | intron     | 0.001671321  | 1.8                  | ENSSSCG0000005959                                     |
| H3GA0011950        | rs80866732   | 4   | 10493687 | intron     | 3.41872E-06  | 1.7                  | ENSSSCG0000005959                                     |
| WU_10.2_4_10724127 | rs342564651  | 4   | 10508063 | intron     | 0.001085978  | 1.7                  | ENSSSCG0000005959                                     |
| WU_10.2_4_10724127 | rs342564651  | 4   | 10508063 | intron     | 0.001085978  | 1.7                  | ENSSSCG0000005959 (31931), ENSSSCG0000005959 (137210) |
| DRGA0004454        | rs80876417   | 4   | 10524007 | intron     | 0.000982427  | 1.7                  | ENSSSCG0000005959                                     |
| H3GA0011952        | rs80880654   | 4   | 10547481 | intron     | -0.01713098  | 1.7                  | ENSSSCG0000005959                                     |

|                     |             |   |           |                            |              |     |                                                           |
|---------------------|-------------|---|-----------|----------------------------|--------------|-----|-----------------------------------------------------------|
| WU_10.2_5_2468497   | rs335297714 | 5 | 12265777  | intergenic                 | -0.01247181  | 2.1 | TIMP3 (79959), SYN3 (234299)                              |
| WU_10.2_5_88710499  | rs326845351 | 5 | 12267943  | intergenic                 | 3.91983E-08  | 1.8 | TIMP3 (82125), SYN3 (232133)                              |
| ASGA0024487         | rs81387465  | 5 | 12306038  | intergenic                 | -0.000851405 | 1.9 | TIMP3 (120220), SYN3 (194038)                             |
| WU_10.2_5_12166660  | rs339872670 | 5 | 12372257  | intergenic                 | -1.24088E-06 | 1.9 | TIMP3 (186439), SYN3 (127819)                             |
| ALGA0030566         | rs81387478  | 5 | 12398727  | intergenic                 | 6.58701E-08  | 1.9 | TIMP3 (212909), SYN3 (101349)                             |
| ASGA0024488         | rs81387482  | 5 | 12452062  | intergenic                 | 2.19254E-07  | 1.9 | TIMP3 (266244), SYN3 (48014)                              |
| WU_10.2_5_12259315  | rs342151864 | 5 | 12473396  | upstream                   | -2.82082E-07 | 1.9 | TIMP3 (287578), SYN3 (26680)                              |
| H3GA0015682         | rs80849107  | 5 | 12487593  | intron                     | 1.01108E-07  | 1.9 | SYN3                                                      |
| H3GA0015682         | rs80849107  | 5 | 12487593  | intron                     | 1.01108E-07  | 1.9 | SYN3 (13800), SYN3 (12483)                                |
| INRA0018490         | rs324200582 | 5 | 12510020  | intron                     | -3.61434E-07 | 1.9 | FBXO7                                                     |
| H3GA0015686         | rs80795165  | 5 | 12544917  | intron                     | -0.000232642 | 1.9 | BPIFC                                                     |
| ASGA0024492         | rs80989679  | 5 | 12567885  | intron                     | -0.04172075  | 1.9 | BPIFC                                                     |
| ASGA0024492         | rs80989679  | 5 | 12567885  | intron                     | -0.04172075  | 1.9 | BPIFC (25619), BPIFC (11069)                              |
| ALGA0037327         | rs81393003  | 6 | 153507600 | regulatory_region          | -9.22856E-05 | 1.8 | ENSSSCG00000060742 (14955),<br>ENSSSCG00000055265 (18878) |
| ALGA0037331         | rs81271871  | 6 | 153539867 | upstream                   | 0.001437153  | 1.8 | ENSSSCG00000048387 (6026),<br>ENSSSCG00000059728 (25661)  |
| ALGA0037340         | rs81393036  | 6 | 153576745 | upstream                   | 0.000112913  | 1.9 | ENSSSCG00000061831 (7479),<br>ENSSSCG00000052447 (11120)  |
| ALGA0037343         | rs81393043  | 6 | 153597317 | non_coding_transcript_exon | -6.79478E-05 | 1.9 | ENSSSCG00000056712                                        |
| WU_10.2_6_141178397 | rs332119045 | 6 | 153633196 | non_coding_transcript_exon | -0.000655225 | 2   | ENSSSCG00000053758                                        |
| ASGA0029872         | rs81393079  | 6 | 153644923 | intergenic                 | -6.34489E-08 | 2   | ENSSSCG00000053758 (14870),<br>ENSSSCG00000056388 (39679) |
| WU_10.2_6_141192870 | rs338944012 | 6 | 153648450 | intergenic                 | -0.001400859 | 2   | ENSSSCG00000053758 (18397),<br>ENSSSCG00000056388 (36152) |
| H3GA0019067         | rs81393069  | 6 | 153668879 | intergenic                 | -0.001455317 | 1.9 | ENSSSCG00000053758 (38826),<br>ENSSSCG00000056388 (15723) |
| MARC0057158         | rs81246878  | 6 | 153675300 | upstream                   | 3.02258E-06  | 1.9 | ENSSSCG00000053758 (45247),<br>ENSSSCG00000056388 (9302)  |
| ALGA0037350         | rs81393063  | 6 | 153702154 | intergenic                 | -2.57948E-05 | 1.9 | JUN (16472), MYSM1 (93381)                                |
| WU_10.2_6_141248398 | rs319529181 | 6 | 153703701 | intergenic                 | 0.06760816   | 1.9 | JUN (18019), MYSM1 (91834)                                |
| WU_10.2_6_148093098 | rs338350400 | 6 | 160390005 | intron                     | 6.32793E-06  | 1.6 | OSBPL9                                                    |
| WU_10.2_6_148132890 | rs321816399 | 6 | 160429795 | intron                     | -1.17752E-05 | 1.6 | OSBPL9                                                    |

|                     |             |   |           |                            |              |     |                                                          |
|---------------------|-------------|---|-----------|----------------------------|--------------|-----|----------------------------------------------------------|
| WU_10.2_6_148158088 | rs333191369 | 6 | 160454991 | intron                     | -1.79602E-05 | 1.6 | OSBPL9                                                   |
| WU_10.2_6_148177389 | rs343360489 | 6 | 160474293 | intron                     | 5.52476E-05  | 1.7 | OSBPL9                                                   |
| WU_10.2_6_148177389 | rs343360489 | 6 | 160474293 | intron                     | 5.52476E-05  | 1.7 | OSBPL9 (85616), OSBPL9 (92076)                           |
| WU_10.2_6_148209459 | rs332227876 | 6 | 160506365 | intron                     | -0.000306128 | 1.7 | OSBPL9                                                   |
| H3GA0019199         | rs81393740  | 6 | 160535498 | intron                     | 0.005828012  | 1.8 | OSBPL9                                                   |
| MARC0057560         | rs81247226  | 6 | 160565896 | intron                     | 0.003625864  | 1.6 | OSBPL9                                                   |
| WU_10.2_7_4658272   | rs80969350  | 7 | 4645765   | intergenic                 | -0.00057687  | 1.7 | ENSSSCG00000001021 (23912), SSR1 (40136)                 |
| ASGA0030712         | rs80932912  | 7 | 4656246   | intron                     | -0.000437539 | 1.7 | SSR1                                                     |
| WU_10.2_7_4680039   | rs323942012 | 7 | 4667522   | intron                     | -0.00104853  | 1.7 | SSR1                                                     |
| WU_10.2_7_4777306   | rs319182788 | 7 | 4689809   | upstream                   | 2.11846E-07  | 1.7 | SSR1 (36888), ENSSSCG00000062690 (5908)                  |
| DRGA0007051         | rs80882694  | 7 | 4717571   | intron                     | -1.30132E-13 | 1.7 | CAGE1                                                    |
| DRGA0007051         | rs80882694  | 7 | 4717571   | intron                     | -1.30132E-13 | 1.7 | CAGE1 (9811), CAGE1 (33102)                              |
| ALGA0038110         | rs81397895  | 7 | 4748257   | intron                     | 2.84014E-10  | 1.7 | CAGE1                                                    |
| ALGA0038112         | rs80970321  | 7 | 4765310   | intron                     | -1.26361E-08 | 1.7 | RIOK1                                                    |
| WU_10.2_7_4885022   | rs338024761 | 7 | 4779335   | 3_prime_UTR                | -8.70562E-09 | 1.7 | RIOK1                                                    |
| H3GA0019625         | rs80964482  | 7 | 4785725   | non_coding_transcript_exon | -8.70562E-09 | 1.7 | ENSSSCG00000043207                                       |
| H3GA0019625         | rs80964482  | 7 | 4785725   | non_coding_transcript_exon | -8.70562E-09 | 1.7 | ENSSSCG00000043207 (2927),<br>ENSSSCG00000043207 (1294)  |
| WU_10.2_7_4900147   | rs334407753 | 7 | 4794544   | downstream                 | -8.70562E-09 | 1.7 | ENSSSCG00000060969 (6708),<br>ENSSSCG00000043136 (10312) |
| ASGA0030735         | rs80851338  | 7 | 4838610   | intergenic                 | -1.09902E-05 | 1.7 | ENSSSCG00000043136 (35887), U6 (66874)                   |
| WU_10.2_7_4959871   | rs333981734 | 7 | 4854266   | intergenic                 | 2.80021E-06  | 1.7 | ENSSSCG00000043136 (51543), U6 (51218)                   |
| WU_10.2_7_4973517   | rs80807606  | 7 | 4867925   | intron                     | 3.52873E-07  | 1.7 | DSP                                                      |
| ALGA0038146         | rs80786020  | 7 | 4883334   | intron                     | -0.000857233 | 1.7 | DSP                                                      |
| H3GA0019644         | rs80971547  | 7 | 4915102   | synonymous                 | -1.15643E-07 | 1.7 | DSP                                                      |
| WU_10.2_7_5034795   | rs327954472 | 7 | 4930409   | intron                     | -5.25545E-08 | 1.7 | SNRNP48                                                  |
| WU_10.2_7_5034795   | rs327954472 | 7 | 4930409   | intron                     | -5.25545E-08 | 1.7 | SNRNP48 (11058), SNRNP48 (5627)                          |
| WU_10.2_7_5042138   | rs80923163  | 7 | 4937752   | downstream                 | 5.43985E-06  | 1.7 | SNRNP48 (18401), BMP6 (272518)                           |
| ASGA0030771         | rs80830170  | 7 | 4950865   | intergenic                 | -4.27339E-10 | 1.7 | SNRNP48 (31514), BMP6 (259405)                           |

|                     |             |   |           |             |              |     |                                                         |
|---------------------|-------------|---|-----------|-------------|--------------|-----|---------------------------------------------------------|
| WU_10.2_7_5102208   | rs319172465 | 7 | 4997822   | intergenic  | -0.000146822 | 1.8 | SNRNP48 (78471), BMP6 (212448)                          |
| M1GA0009455         | rs80986401  | 7 | 5008671   | intergenic  | -5.68976E-05 | 1.8 | SNRNP48 (89320), BMP6 (201599)                          |
| ASGA0030788         | rs80792076  | 7 | 5031479   | intergenic  | 1.57357E-06  | 1.8 | SNRNP48 (112128), BMP6 (178791)                         |
| WU_10.2_7_5162412   | rs343176224 | 7 | 5058020   | upstream    | 1.32455E-06  | 1.8 | SNRNP48 (138669), BMP6 (152250)                         |
| M1GA0009457         | rs80938216  | 7 | 5089734   | intron      | -0.07553443  | 1.9 | BMP6                                                    |
| ASGA0040427         | rs81405706  | 8 | 135274760 | 3_prime_UTR | 3.80499E-07  | 1.7 | ENSSSCG00000009240                                      |
| ALGA0050145         | rs81405710  | 8 | 135285532 | intron      | 5.60078E-06  | 1.7 | COPS4                                                   |
| WU_10.2_8_144693654 | rs345777825 | 8 | 135398502 | intron      | 3.7104E-07   | 1.7 | THAP9                                                   |
| ALGA0117619         | rs81347425  | 8 | 135427306 | intron      | 3.85982E-07  | 1.7 | SEC31A                                                  |
| 8_144744932         | rs328673214 | 8 | 135449779 | intron      | 5.65452E-07  | 1.7 | SEC31A                                                  |
| WU_10.2_8_144771629 | rs345296578 | 8 | 135476476 | intron      | 1.85796E-06  | 1.7 | SEC31A                                                  |
| WU_10.2_8_144847860 | rs334436239 | 8 | 135487158 | intron      | 4.3567E-07   | 1.7 | SEC31A                                                  |
| H3GA0052926         | rs81336088  | 8 | 135491186 | intron      | 5.60382E-07  | 1.7 | SEC31A                                                  |
| WU_10.2_8_144898378 | rs319261432 | 8 | 135537530 | intron      | 5.62168E-07  | 1.7 | SCD5                                                    |
| WU_10.2_8_144927686 | rs320260240 | 8 | 135566615 | intron      | 3.87559E-06  | 1.7 | SCD5                                                    |
| ALGA0121391         | rs81328969  | 8 | 135591552 | intron      | 3.27073E-09  | 1.7 | SCD5                                                    |
| H3GA0054370         | rs81328785  | 8 | 135604963 | intron      | 6.01006E-08  | 1.7 | SCD5                                                    |
| DRGA0017418         | rs81339189  | 8 | 135607348 | intron      | 3.69423E-08  | 1.7 | SCD5                                                    |
| ALGA0109193         | rs81337243  | 8 | 135629399 | intron      | 3.68088E-08  | 1.7 | SCD5                                                    |
| WU_10.2_8_145018548 | rs338821365 | 8 | 135648560 | downstream  | 9.09968E-08  | 1.7 | ENSSSCG00000052420 (9892),<br>ENSSSCG00000060705 (5196) |
| ASGA0082238         | rs81330273  | 8 | 135665981 | intergenic  | 2.52914E-07  | 1.7 | ENSSSCG00000060705 (16178), U6 (54432)                  |
| ASGA0105760         | rs81305967  | 8 | 135668712 | intergenic  | 5.95358E-07  | 1.7 | ENSSSCG00000060705 (18909), U6 (51701)                  |
| MARC0065298         | rs81253423  | 8 | 135689152 | intron      | 2.44483E-08  | 1.7 | TMEM150C                                                |
| ALGA0105830         | rs339198846 | 8 | 135699278 | intron      | -0.000138345 | 1.7 | TMEM150C                                                |
| ASGA0092699         | rs81311486  | 8 | 135719143 | intron      | -3.05086E-07 | 1.7 | TMEM150C                                                |
| ASGA0102835         | rs81476910  | 8 | 135728719 | intron      | -3.04292E-07 | 1.7 | TMEM150C                                                |
| MARC0059365         | rs81249045  | 8 | 135751832 | intron      | 4.52085E-09  | 1.7 | TMEM150C                                                |

|                     |              |    |           |                            |              |     |                                                             |
|---------------------|--------------|----|-----------|----------------------------|--------------|-----|-------------------------------------------------------------|
| ASGA0104181         | rs81304104   | 8  | 135768303 | downstream                 | 0.02361438   | 1.7 | U6 (47996), ENOPH1 (34085)                                  |
| WU_10.2_10_5326729  | rs331367368  | 10 | 3501675   | downstream                 | 1.00791E-07  | 1.7 | BRINP3 (538148), ENSSSCG00000057470 (5265)                  |
| WU_10.2_10_5357268  | rs340231888  | 10 | 3532219   | intergenic                 | 2.88977E-09  | 1.7 | ENSSSCG00000057470 (29568),<br>ENSSSCG00000053245 (65449)   |
| WU_10.2_10_5369955  | rs339644447  | 10 | 3544904   | intergenic                 | 1.12653E-09  | 1.7 | ENSSSCG00000057470 (42253),<br>ENSSSCG00000053245 (52764)   |
| ALGA0056487         | rs81425365   | 10 | 3572114   | intergenic                 | 0.001679716  | 1.7 | ENSSSCG00000057470 (69463),<br>ENSSSCG00000053245 (25554)   |
| MARC0056124         | rs81245706   | 10 | 3605230   | intergenic                 | -0.001112193 | 1.7 | ENSSSCG00000053245 (13082),<br>ENSSSCG00000062242 (335879)  |
| WU_10.2_10_5531412  | rs328042345  | 10 | 3620686   | intergenic                 | -0.000391314 | 1.7 | ENSSSCG00000053245 (28538),<br>ENSSSCG00000062242 (320423)  |
| WU_10.2_10_5514795  | rs330675368  | 10 | 3637304   | intergenic                 | 1.8132E-08   | 1.7 | ENSSSCG00000053245 (45156),<br>ENSSSCG00000062242 (303805)  |
| MARC0078321         | rs81263076   | 10 | 3649148   | intergenic                 | 0.002273651  | 1.7 | ENSSSCG00000053245 (57000),<br>ENSSSCG00000062242 (291961)  |
| WU_10.2_10_5459685  | rs333581856  | 10 | 3692446   | intergenic                 | 4.25061E-12  | 1.6 | ENSSSCG00000053245 (100298),<br>ENSSSCG00000062242 (248663) |
| WU_10.2_10_5624281  | rs337718630  | 10 | 3827654   | intergenic                 | 8.8155E-09   | 1.6 | ENSSSCG00000053245 (235506),<br>ENSSSCG00000062242 (113455) |
| DRGA0010149         | rs81302827   | 10 | 3843921   | intergenic                 | 8.83858E-09  | 1.6 | ENSSSCG00000053245 (251773),<br>ENSSSCG00000062242 (97188)  |
| ALGA0056525         | rs81426046   | 10 | 3937743   | non_coding_transcript_exon | 0.04626359   | 1.6 | ENSSSCG00000062242                                          |
| 10007668            | rs81218852   | 10 | 19391507  | synonymous                 | -1.25652E-07 | 2.7 | TLR5                                                        |
| H3GA0029533         | rs81421707   | 10 | 19409070  | intron                     | 1.1656E-17   | 2.7 | TLR5                                                        |
| CASI0009135         | rs345690779  | 10 | 19411706  | upstream                   | -3.33206E-07 | 2.7 | TLR5 (24040), SUSD4 (140134)                                |
| ALGA0057679         | rs81421752   | 10 | 19512266  | intron                     | 0.01626834   | 2.7 | SUSD4                                                       |
| WU_10.2_10_22034045 | rs344136854  | 10 | 19535825  | intron                     | 0.008806583  | 2.1 | SUSD4                                                       |
| ASGA0046986         | rs81421775   | 10 | 19572163  | intergenic                 | -1.23299E-09 | 1.9 | SUSD4 (150598), ENSSSCG00000010888 (14231)                  |
| WU_10.2_10_22164312 | rs327591080  | 10 | 19604335  | intergenic                 | -0.000786143 | 1.9 | ENSSSCG00000010888 (19173),<br>ENSSSCG00000054070 (54172)   |
| WU_10.2_10_22123753 | rs342419073  | 10 | 19645727  | intergenic                 | -3.17315E-07 | 1.9 | ENSSSCG00000010888 (60565),<br>ENSSSCG00000054070 (12780)   |
| MARC0010568         | rs3474528732 | 10 | 19715055  | intron                     | -9.68071E-08 | 1.9 | CAPN8                                                       |
| ASGA0095681         | rs81315152   | 10 | 19753037  | intergenic                 | -1.06555E-07 | 1.9 | CAPN8 (87182), CAPN2 (67209)                                |
| MARC0105091         | rs3471802107 | 10 | 19780059  | intron                     | 0.02230717   | 1.9 | CAPN2                                                       |

|                     |             |    |          |                   |              |     |                                                         |
|---------------------|-------------|----|----------|-------------------|--------------|-----|---------------------------------------------------------|
| ASGA0098449         | rs81318702  | 10 | 24795288 | intron            | 1.94965E-07  | 1.6 | KDM5B                                                   |
| WU_10.2_10_29208538 | rs346173073 | 10 | 24850398 | intergenic        | -0.03287021  | 1.6 | ENSSSCG00000021179 (8097),<br>ENSSSCG00000044728 (5116) |
| ASGA0084454         | rs81343376  | 12 | 6971812  | intergenic        | 3.78362E-05  | 3.7 | RPL38 (86910), ENSSSCG00000046071 (647627)              |
| MARC0075255         | rs81260438  | 12 | 6982421  | intergenic        | 1.65511E-11  | 3.7 | RPL38 (97519), ENSSSCG00000046071 (637018)              |
| M1GA0026980         | rs81323860  | 12 | 6995769  | intergenic        | 1.02398E-08  | 3.7 | RPL38 (110867), ENSSSCG00000046071 (623670)             |
| ALGA0103381         | rs81478115  | 12 | 7006069  | regulatory_region | 7.43838E-12  | 3.7 | RPL38 (121167), ENSSSCG00000046071 (613370)             |
| ASGA0052681         | rs81436220  | 12 | 7048858  | intergenic        | 2.03123E-10  | 3.6 | RPL38 (163956), ENSSSCG00000046071 (570581)             |
| H3GA0033126         | rs81436398  | 12 | 7067951  | intergenic        | 2.62612E-05  | 3.6 | RPL38 (183049), ENSSSCG00000046071 (551488)             |
| MARC0046612         | rs81236893  | 12 | 7080205  | intergenic        | 1.37058E-10  | 3.6 | RPL38 (195303), ENSSSCG00000046071 (539234)             |
| WU_10.2_12_7124825  | rs345556034 | 12 | 7097729  | intergenic        | 1.82204E-07  | 3.6 | RPL38 (212827), ENSSSCG00000046071 (521710)             |
| H3GA0033141         | rs81436583  | 12 | 7127237  | intergenic        | 1.3506E-09   | 3.6 | RPL38 (242335), ENSSSCG00000046071 (492202)             |
| WU_10.2_12_7581758  | rs337597858 | 12 | 7159210  | intergenic        | 0.000174117  | 3.7 | RPL38 (274308), ENSSSCG00000046071 (460229)             |
| H3GA0033163         | rs81436813  | 12 | 7188626  | intergenic        | -4.39043E-05 | 3.7 | RPL38 (303724), ENSSSCG00000046071 (430813)             |
| ALGA0064531         | rs81436950  | 12 | 7225821  | intergenic        | -0.000206224 | 3.7 | RPL38 (340919), ENSSSCG00000046071 (393618)             |
| WU_10.2_12_7507773  | rs326956108 | 12 | 7233173  | intergenic        | 2.10104E-05  | 3.7 | RPL38 (348271), ENSSSCG00000046071 (386266)             |
| ASGA0052741         | rs81437044  | 12 | 7247426  | intergenic        | -0.000223778 | 3.7 | RPL38 (362524), ENSSSCG00000046071 (372013)             |
| H3GA0033190         | rs81437363  | 12 | 7283888  | intergenic        | 2.79947E-08  | 3.7 | RPL38 (398986), ENSSSCG00000046071 (335551)             |
| DRGA0011569         | rs81300895  | 12 | 7302134  | intergenic        | 7.18764E-13  | 3.7 | RPL38 (417232), ENSSSCG00000046071 (317305)             |
| WU_10.2_12_7398515  | rs81437611  | 12 | 7341458  | intergenic        | 0.000697784  | 3.7 | RPL38 (456556), ENSSSCG00000046071 (277981)             |
| WU_10.2_12_7394362  | rs325492649 | 12 | 7345606  | intergenic        | 4.95795E-05  | 3.7 | RPL38 (460704), ENSSSCG00000046071 (273833)             |
| WU_10.2_12_7385966  | rs318399475 | 12 | 7354001  | intergenic        | 0.003297275  | 3.7 | RPL38 (469099), ENSSSCG00000046071 (265438)             |
| WU_10.2_12_7634052  | rs338584089 | 12 | 7354388  | intergenic        | 6.68669E-05  | 3.6 | RPL38 (469486), ENSSSCG00000046071 (265051)             |
| ASGA0090707         | rs81309086  | 12 | 7371353  | intergenic        | 0.01305383   | 3.6 | RPL38 (486451), ENSSSCG00000046071 (248086)             |
| ALGA0105065         | rs81332319  | 12 | 7414272  | intergenic        | 1.40866E-05  | 3   | RPL38 (529370), ENSSSCG00000046071 (205167)             |
| ASGA0095520         | rs81314949  | 12 | 7418252  | intergenic        | 0.000256823  | 3   | RPL38 (533350), ENSSSCG00000046071 (201187)             |
| ASGA0084859         | rs335889358 | 12 | 7418384  | regulatory_region | 9.88463E-07  | 3   | RPL38 (533482), ENSSSCG00000046071 (201055)             |
| ASGA0083611         | rs81338615  | 12 | 7420790  | intergenic        | 1.144E-12    | 3   | RPL38 (535888), ENSSSCG00000046071 (198649)             |

|                      |             |    |           |            |              |     |                                                            |
|----------------------|-------------|----|-----------|------------|--------------|-----|------------------------------------------------------------|
| H3GA0054071          | rs81325851  | 12 | 7421785   | intergenic | 0.000211604  | 3   | RPL38 (536883), ENSSSCG00000046071 (197654)                |
| ASGA0092609          | rs81311382  | 12 | 7458764   | intergenic | -3.38458E-07 | 3   | RPL38 (573862), ENSSSCG00000046071 (160675)                |
| M1GA0026970          | rs81323725  | 12 | 7467740   | intergenic | 0.1113275    | 3.1 | RPL38 (582838), ENSSSCG00000046071 (151699)                |
| WU_10.2_15_135856391 | rs337090786 | 15 | 122539331 | intergenic | 0.001690958  | 2.5 | ENSSSCG00000062066 (111506),<br>ENSSSCG00000060048 (12313) |
| ALGA0087403          | rs81455161  | 15 | 122578140 | intergenic | -0.01960898  | 2.5 | ENSSSCG00000060048 (29911),<br>ENSSSCG00000059125 (63084)  |
| ASGA0070852          | rs81455155  | 15 | 122598272 | intergenic | 4.44778E-12  | 1.7 | ENSSSCG00000060048 (50043),<br>ENSSSCG00000059125 (42952)  |
| WU_10.2_15_135925574 | rs324455174 | 15 | 122608399 | intergenic | 0.001238929  | 1.7 | ENSSSCG00000060048 (60170),<br>ENSSSCG00000059125 (32825)  |
| WU_10.2_15_135980884 | rs322071406 | 15 | 122663668 | intergenic | 0.001104923  | 1.7 | ENSSSCG00000059125 (26755), EPHA4 (839458)                 |
| ALGA0087385          | rs81455131  | 15 | 122682398 | intergenic | 3.21097E-08  | 1.6 | ENSSSCG00000059125 (45485), EPHA4 (820728)                 |
| WU_10.2_15_136009793 | rs81455128  | 15 | 122692545 | intergenic | 3.21097E-08  | 1.6 | ENSSSCG00000059125 (55632), EPHA4 (810581)                 |
| ALGA0087381          | rs81455126  | 15 | 122704300 | intergenic | 2.3191E-08   | 1.6 | ENSSSCG00000059125 (67387), EPHA4 (798826)                 |
| H3GA0045110          | rs81455122  | 15 | 122718113 | intergenic | -0.00262943  | 1.6 | ENSSSCG00000059125 (81200), EPHA4 (785013)                 |
| WU_10.2_15_136367391 | rs345442617 | 15 | 122964587 | intergenic | -2.84282E-10 | 1.6 | ENSSSCG00000059125 (327674), EPHA4 (538539)                |
| WU_10.2_15_136319027 | rs340393759 | 15 | 123015411 | intergenic | -7.63959E-10 | 1.7 | ENSSSCG00000059125 (378498), EPHA4 (487715)                |
| MARC0010057          | rs81263210  | 15 | 123051624 | intergenic | -0.08380099  | 1.7 | ENSSSCG00000059125 (414711), EPHA4 (451502)                |
| ALGA0106375          | rs81333847  | 16 | 72782016  | intron     | -2.07868E-13 | 2.1 | SEMA5A                                                     |
| ALGA0109858          | rs81338026  | 16 | 72782953  | intron     | -1.25077E-09 | 2.1 | SEMA5A                                                     |
| WU_10.2_16_78743591  | rs341244976 | 16 | 72797915  | intron     | 9.35678E-09  | 2.1 | SEMA5A                                                     |
| WU_10.2_16_78747732  | rs337368987 | 16 | 72802056  | intron     | 9.5397E-10   | 2.1 | SEMA5A                                                     |
| WU_10.2_16_78767897  | rs323134864 | 16 | 72822331  | intron     | -8.0133E-11  | 1.9 | SEMA5A                                                     |
| ALGA0106517          | rs81334031  | 16 | 72831317  | intron     | -2.09489E-09 | 1.9 | SEMA5A                                                     |
| WU_10.2_16_78796653  | rs346390358 | 16 | 72852336  | intron     | -4.03912E-10 | 1.9 | SEMA5A                                                     |
| ALGA0091889          | rs81462644  | 16 | 72868185  | intron     | -1.80393E-09 | 1.9 | SEMA5A                                                     |
| ASGA0074361          | rs81462651  | 16 | 72889488  | intron     | 1.06788E-05  | 2   | SEMA5A                                                     |
| ASGA0105318          | rs81305400  | 16 | 72895691  | intron     | -0.00101005  | 2   | SEMA5A                                                     |
| ALGA0091895          | rs81462668  | 16 | 72901318  | intron     | -0.001010387 | 1.9 | SEMA5A                                                     |

|                     |             |    |          |            |              |     |                                                            |
|---------------------|-------------|----|----------|------------|--------------|-----|------------------------------------------------------------|
| ASGA0074369         | rs81462674  | 16 | 72959005 | intron     | -0.000894904 | 1.9 | SEMA5A                                                     |
| WU_10.2_16_78907155 | rs328025938 | 16 | 72978738 | intron     | -0.001082639 | 1.9 | SEMA5A                                                     |
| ASGA0074372         | rs81462678  | 16 | 72984010 | intron     | -0.000887138 | 1.9 | SEMA5A                                                     |
| WU_10.2_16_78925811 | rs319849366 | 16 | 72998820 | intron     | -9.383E-08   | 1.9 | SEMA5A                                                     |
| WU_10.2_16_78946145 | rs340236444 | 16 | 73019118 | intron     | 0.000449775  | 1.9 | SEMA5A                                                     |
| MARC0040336         | rs81233287  | 16 | 73041036 | intron     | -0.000415253 | 1.9 | SEMA5A                                                     |
| H3GA0047211         | rs81462722  | 16 | 73056992 | intron     | -0.000100288 | 1.9 | SEMA5A                                                     |
| H3GA0047209         | rs81462697  | 16 | 73139057 | intron     | -0.000300235 | 1.9 | SEMA5A                                                     |
| M1GA0021223         | rs81462700  | 16 | 73153511 | synonymous | -0.000764642 | 1.9 | SEMA5A                                                     |
| WU_10.2_16_79204951 | rs336130944 | 16 | 73236825 | synonymous | -0.07519184  | 1.8 | SEMA5A                                                     |
| ALGA0097014         | rs81470637  | 18 | 11247266 | intergenic | 0.01582865   | 1.6 | ENSSSCG00000050345 (134395),<br>ENSSSCG00000044154 (57140) |

<sup>1</sup>percentage of genetic variance explained by 0.52 Mb; <sup>2</sup>gene symbols when intronic or gene symbols (distance) adjacent to the marker when intergenic

**Table S4** Summary of GWAS with the significant 0.52 Mb windows that were associated with the total number of stillbirth (TNS in Korean Berkshire pigs).

| SNP                 | rsid        | chr | Position  | Variant    | SNP effect   | gVar(%) <sup>1</sup> | Gene annotation <sup>2</sup>                               |
|---------------------|-------------|-----|-----------|------------|--------------|----------------------|------------------------------------------------------------|
| WU_10.2_1_282489432 | rs338021506 | 1   | 251731634 | intron     | -5.29386E-07 | 1.9                  | MUSK                                                       |
| WU_10.2_1_282489432 | rs338021506 | 1   | 251731634 | intron     | -5.29386E-07 | 1.9                  | MUSK (80924), MUSK (24974)                                 |
| ASGA0093392         | rs81474187  | 1   | 251748865 | intron     | 3.09836E-13  | 2.9                  | MUSK                                                       |
| WU_10.2_1_282594005 | rs332137984 | 1   | 251781867 | intergenic | -0.000120496 | 3.4                  | MUSK (131157), ENSSSCG00000059916 (16593)                  |
| H3GA0055661         | rs791879427 | 1   | 251816790 | intron     | -0.000114396 | 3.4                  | ENSSSCG00000005457                                         |
| H3GA0055661         | rs791879427 | 1   | 251816790 | intron     | -0.000114396 | 3.4                  | ENSSSCG00000005457 (5206),<br>ENSSSCG00000044924 (14456)   |
| MARC0062690         | rs81251291  | 1   | 251824144 | intron     | 0.000119609  | 3.4                  | ENSSSCG00000005457                                         |
| ASGA0102913         | rs81474268  | 1   | 251853287 | intron     | -2.65151E-11 | 3.3                  | ENSSSCG00000005457                                         |
| ASGA0102913         | rs81474268  | 1   | 251853287 | intron     | -2.65151E-11 | 3.3                  | ENSSSCG00000044924 (26296),<br>ENSSSCG00000005457 (125872) |
| WU_10.2_1_282649558 | rs334406549 | 1   | 251857701 | intron     | -2.0887E-12  | 3.3                  | ENSSSCG00000005457                                         |
| WU_10.2_1_282662716 | rs329545849 | 1   | 251870861 | intron     | -1.98214E-14 | 3.3                  | ENSSSCG00000005457                                         |
| ASGA0006708         | rs80863919  | 1   | 251939764 | intron     | 5.84335E-14  | 3.3                  | ENSSSCG00000005457                                         |
