# Supplementary material for: Comprehensive genome-wide analysis of genetic loci and candidate genes associated with litter traits in purebred Berkshire pigs of Korea
Source: PubMed Central journal article supplement (PMC11366516; doi:10.5713/ab.24.0046), 2024-08-18
Supplement: ab-24-0046-Supplementary-Table-4.pdf [file ab-24-0046-Supplementary-Table-4.pdf]

|                     |             |    |          |            |              |     |                                                            |
|---------------------|-------------|----|----------|------------|--------------|-----|------------------------------------------------------------|
| ASGA0074369         | rs81462674  | 16 | 72959005 | intron     | -0.000894904 | 1.9 | SEMA5A                                                     |
| WU_10.2_16_78907155 | rs328025938 | 16 | 72978738 | intron     | -0.001082639 | 1.9 | SEMA5A                                                     |
| ASGA0074372         | rs81462678  | 16 | 72984010 | intron     | -0.000887138 | 1.9 | SEMA5A                                                     |
| WU_10.2_16_78925811 | rs319849366 | 16 | 72998820 | intron     | -9.383E-08   | 1.9 | SEMA5A                                                     |
| WU_10.2_16_78946145 | rs340236444 | 16 | 73019118 | intron     | 0.000449775  | 1.9 | SEMA5A                                                     |
| MARC0040336         | rs81233287  | 16 | 73041036 | intron     | -0.000415253 | 1.9 | SEMA5A                                                     |
| H3GA0047211         | rs81462722  | 16 | 73056992 | intron     | -0.000100288 | 1.9 | SEMA5A                                                     |
| H3GA0047209         | rs81462697  | 16 | 73139057 | intron     | -0.000300235 | 1.9 | SEMA5A                                                     |
| M1GA0021223         | rs81462700  | 16 | 73153511 | synonymous | -0.000764642 | 1.9 | SEMA5A                                                     |
| WU_10.2_16_79204951 | rs336130944 | 16 | 73236825 | synonymous | -0.07519184  | 1.8 | SEMA5A                                                     |
| ALGA0097014         | rs81470637  | 18 | 11247266 | intergenic | 0.01582865   | 1.6 | ENSSSCG00000050345 (134395),<br>ENSSSCG00000044154 (57140) |

<sup>1</sup>percentage of genetic variance explained by 0.52 Mb; <sup>2</sup>gene symbols when intronic or gene symbols (distance) adjacent to the marker when intergenic

**Table S4** Summary of GWAS with the significant 0.52 Mb windows that were associated with the total number of stillbirth (TNS in Korean Berkshire pigs).

| SNP                 | rsid        | chr | Position  | Variant    | SNP effect   | gVar(%) <sup>1</sup> | Gene annotation <sup>2</sup>                               |
|---------------------|-------------|-----|-----------|------------|--------------|----------------------|------------------------------------------------------------|
| WU_10.2_1_282489432 | rs338021506 | 1   | 251731634 | intron     | -5.29386E-07 | 1.9                  | MUSK                                                       |
| WU_10.2_1_282489432 | rs338021506 | 1   | 251731634 | intron     | -5.29386E-07 | 1.9                  | MUSK (80924), MUSK (24974)                                 |
| ASGA0093392         | rs81474187  | 1   | 251748865 | intron     | 3.09836E-13  | 2.9                  | MUSK                                                       |
| WU_10.2_1_282594005 | rs332137984 | 1   | 251781867 | intergenic | -0.000120496 | 3.4                  | MUSK (131157), ENSSSCG00000059916 (16593)                  |
| H3GA0055661         | rs791879427 | 1   | 251816790 | intron     | -0.000114396 | 3.4                  | ENSSSCG00000005457                                         |
| H3GA0055661         | rs791879427 | 1   | 251816790 | intron     | -0.000114396 | 3.4                  | ENSSSCG00000005457 (5206),<br>ENSSSCG00000044924 (14456)   |
| MARC0062690         | rs81251291  | 1   | 251824144 | intron     | 0.000119609  | 3.4                  | ENSSSCG00000005457                                         |
| ASGA0102913         | rs81474268  | 1   | 251853287 | intron     | -2.65151E-11 | 3.3                  | ENSSSCG00000005457                                         |
| ASGA0102913         | rs81474268  | 1   | 251853287 | intron     | -2.65151E-11 | 3.3                  | ENSSSCG00000044924 (26296),<br>ENSSSCG00000005457 (125872) |
| WU_10.2_1_282649558 | rs334406549 | 1   | 251857701 | intron     | -2.0887E-12  | 3.3                  | ENSSSCG00000005457                                         |
| WU_10.2_1_282662716 | rs329545849 | 1   | 251870861 | intron     | -1.98214E-14 | 3.3                  | ENSSSCG00000005457                                         |
| ASGA0006708         | rs80863919  | 1   | 251939764 | intron     | 5.84335E-14  | 3.3                  | ENSSSCG00000005457                                         |

20  
21  
22

|                     |              |   |           |             |              |     |                                                           |
|---------------------|--------------|---|-----------|-------------|--------------|-----|-----------------------------------------------------------|
| DRGA0002331         | rs80855017   | 1 | 251969178 | intron      | 4.29912E-14  | 3.3 | ENSSSCG00000005457                                        |
| DRGA0002331         | rs80855017   | 1 | 251969178 | intron      | 4.29912E-14  | 3.3 | ENSSSCG00000044924 (142187),<br>ENSSSCG00000005457 (9981) |
| ALGA0009238         | rs80796469   | 1 | 252048165 | intergenic  | -4.90466E-05 | 3.3 | ENSSSCG00000044924 (221174), OR2K2 (156888)               |
| ALGA0009241         | rs81351729   | 1 | 252065641 | intergenic  | 0.000318225  | 3.3 | ENSSSCG00000044924 (238650), OR2K2 (139412)               |
| ASGA0006726         | rs80837660   | 1 | 252080736 | intergenic  | -0.000290017 | 3.2 | ENSSSCG00000044924 (253745), OR2K2 (124317)               |
| WU_10.2_1_282945364 | rs321619340  | 1 | 252114281 | intergenic  | -2.81677E-11 | 3.2 | ENSSSCG00000044924 (287290), OR2K2 (90772)                |
| H3GA0004278         | rs80998992   | 1 | 252150964 | intergenic  | 1.22452E-06  | 3.2 | ENSSSCG00000044924 (323973), OR2K2 (54089)                |
| MARC0021903         | rs80890612   | 1 | 252166930 | intergenic  | 4.92493E-05  | 3.2 | ENSSSCG00000044924 (339939), OR2K2 (38123)                |
| ASGA0006736         | rs80843083   | 1 | 252179117 | intergenic  | -3.6569E-08  | 3.2 | ENSSSCG00000044924 (352126), OR2K2 (25936)                |
| ALGA0009256         | rs80822720   | 1 | 252203530 | downstream  | 0.004170362  | 3.2 | ENSSSCG00000044924 (376539), OR2K2 (1523)                 |
| DIAS0002996         | rs81212970   | 1 | 252226444 | synonymous  | 0.004410882  | 1.8 | ECPAS                                                     |
| WU_10.2_2_2746883   | rs342277625  | 2 | 4093991   | synonymous  | 0.000616272  | 3.1 | TPCN2                                                     |
| ALGA0011405         | rs3469852568 | 2 | 4134845   | downstream  | 2.46251E-09  | 3   | MRGPRF (11016), ENSSSCG00000055208 (7801)                 |
| ASGA0008471         | rs3475937152 | 2 | 4163306   | intergenic  | -2.2799E-11  | 3   | ENSSSCG00000042011 (8075), IGHMBP2 (31219)                |
| WU_10.2_2_2770500   | rs336307381  | 2 | 4190826   | intron      | 0.003077523  | 3   | IGHMBP2                                                   |
| MARC0011145         | rs81256301   | 2 | 4209351   | downstream  | -8.01946E-12 | 2.3 | ENSSSCG00000012879 (14781), CPT1A (84560)                 |
| WU_10.2_2_2807393   | rs337343937  | 2 | 4226815   | intergenic  | -1.84254E-10 | 2.3 | ENSSSCG00000012879 (32245), CPT1A (67096)                 |
| M1GA0002244         | rs81362590   | 2 | 4267626   | intron      | -2.06779E-07 | 2.3 | CPT1A                                                     |
| M1GA0002231         | rs81362193   | 2 | 4279062   | intron      | 8.8598E-06   | 2.3 | CPT1A                                                     |
| M1GA0002231         | rs81362193   | 2 | 4279062   | intron      | 8.8598E-06   | 2.3 | CPT1A (45963), CPT1A (14849)                              |
| MARC0070315         | rs81256907   | 2 | 4291890   | 3_prime_UTR | 0.000334255  | 2.3 | CPT1A                                                     |
| M1GA0002229         | rs81361514   | 2 | 4341271   | downstream  | 6.71317E-06  | 2.2 | TESMIN (43319), GAL (15376)                               |
| M1GA0002246         | rs788180999  | 2 | 4365346   | intergenic  | -1.77015E-09 | 2.2 | GAL (14233), PPP6R3 (158065)                              |
| H3GA0005584         | rs81363333   | 2 | 4378975   | intergenic  | -1.54227E-15 | 2.2 | GAL (27862), PPP6R3 (144436)                              |
| WU_10.2_2_2976035   | rs336156132  | 2 | 4395779   | 3_prime_UTR | -4.0854E-15  | 2.2 | PPP6R3                                                    |
| H3GA0005590         | rs81364067   | 2 | 4412670   | intron      | -0.000209516 | 2.2 | PPP6R3                                                    |
| WU_10.2_2_3004313   | rs81364257   | 2 | 4424056   | intron      | 0.000710609  | 2.2 | PPP6R3                                                    |

|                    |             |   |          |                            |              |     |                                                            |
|--------------------|-------------|---|----------|----------------------------|--------------|-----|------------------------------------------------------------|
| M1GA0002263        | rs81364734  | 2 | 4444553  | intron                     | -4.19525E-08 | 2.1 | PPP6R3                                                     |
| M1GA0002265        | rs81366488  | 2 | 4457240  | intron                     | -1.67855E-08 | 2.1 | PPP6R3                                                     |
| WU_10.2_2_3095872  | rs328050650 | 2 | 4465980  | intron                     | -7.50027E-06 | 2.1 | PPP6R3                                                     |
| WU_10.2_2_3104145  | rs341117829 | 2 | 4474254  | intron                     | -0.000160581 | 2.1 | PPP6R3                                                     |
| WU_10.2_2_3104145  | rs341117829 | 2 | 4474254  | intron                     | -0.000160581 | 2.1 | PPP6R3 (79579), PPP6R3 (49157)                             |
| ALGA0109310        | rs81337384  | 2 | 4531357  | downstream                 | 0.0019807    | 2   | PPP6R3 (136682), LRP5 (122587)                             |
| 2_3203612          | rs325591449 | 2 | 4568691  | intron                     | -1.12465E-11 | 1.8 | LRP5                                                       |
| WU_10.2_2_3385614  | rs326656297 | 2 | 4605668  | intron                     | 0.01364457   | 1.8 | LRP5                                                       |
| WU_10.2_7_12567601 | rs328248426 | 7 | 11971804 | intergenic                 | 0.002922849  | 4.8 | ENSSSCG00000052001 (178986),<br>ENSSSCG00000054172 (64218) |
| ALGA0038692        | rs80898557  | 7 | 11989354 | intergenic                 | 9.00512E-05  | 4.2 | ENSSSCG00000052001 (196536),<br>ENSSSCG00000054172 (46668) |
| ALGA0038697        | rs80852057  | 7 | 12045842 | intergenic                 | 5.83305E-05  | 4.2 | ENSSSCG00000054172 (15545),<br>ENSSSCG00000061595 (39182)  |
| WU_10.2_7_12661047 | rs341821663 | 7 | 12065247 | intergenic                 | 5.69232E-05  | 4.2 | ENSSSCG00000054172 (34950),<br>ENSSSCG00000061595 (19777)  |
| H3GA0020000        | rs80944404  | 7 | 12084107 | non_coding_transcript_exon | 5.69183E-05  | 4.2 | ENSSSCG00000061595                                         |
| H3GA0020000        | rs80944404  | 7 | 12084107 | non_coding_transcript_exon | 5.69183E-05  | 4.2 | ENSSSCG00000057253                                         |
| WU_10.2_7_12695778 | rs321301006 | 7 | 12099976 | intergenic                 | 5.69232E-05  | 4.6 | ENSSSCG00000057253 (17515), MYLIP (37949)                  |
| ALGA0038703        | rs80839173  | 7 | 12114493 | upstream                   | -8.6652E-12  | 4.6 | ENSSSCG00000057253 (32032), MYLIP (23432)                  |
| H3GA0020002        | rs80900332  | 7 | 12135480 | intron                     | -1.13184E-08 | 4.6 | MYLIP                                                      |
| H3GA0020002        | rs80900332  | 7 | 12135480 | intron                     | -1.13184E-08 | 4.6 | MYLIP (18240), MYLIP (2445)                                |
| DRGA0007138        | rs80799020  | 7 | 12147428 | downstream                 | 1.5999E-12   | 4.6 | MYLIP (30188), ENSSSCG00000051868 (10282)                  |
| ASGA0031290        | rs80949504  | 7 | 12253352 | upstream                   | -4.35925E-07 | 4.6 | ENSSSCG00000057138 (19531), GMPR (46179)                   |
| H3GA0020006        | rs80956848  | 7 | 12274672 | intron                     | 0.006182223  | 4.6 | GMPR                                                       |
| ALGA0038729        | rs80989281  | 7 | 12292990 | intron                     | -2.21982E-05 | 3.1 | GMPR                                                       |
| ALGA0038729        | rs80989281  | 7 | 12292990 | intron                     | -2.21982E-05 | 3.1 | GMPR (38602), GMPR (6541)                                  |
| WU_10.2_7_12911090 | rs343319634 | 7 | 12312194 | intron                     | -0.000666984 | 3.1 | ATXN1                                                      |
| ALGA0038731        | rs80889526  | 7 | 12319312 | intron                     | -3.59692E-09 | 3.1 | ATXN1                                                      |
| WU_10.2_7_12941421 | rs341051420 | 7 | 12342523 | intron                     | 1.98613E-06  | 3.1 | ATXN1                                                      |

|                     |             |   |           |                            |              |     |                                                          |
|---------------------|-------------|---|-----------|----------------------------|--------------|-----|----------------------------------------------------------|
| ASGA0031322         | rs80826770  | 7 | 12424533  | intron                     | -9.72746E-13 | 3.1 | ATXN1                                                    |
| WU_10.2_7_13046917  | rs338544958 | 7 | 12447284  | intron                     | 0.002268991  | 3.1 | ATXN1                                                    |
| ALGA0038747         | rs80865722  | 7 | 12471569  | upstream                   | -0.01547467  | 2.6 | ENSSSCG00000050012 (32833),<br>ENSSSCG00000058629 (6005) |
| WU_10.2_7_123337647 | rs326137282 | 7 | 116204637 | intergenic                 | 7.08337E-09  | 2.1 | ENSSSCG00000052470 (63715), DICER1 (206587)              |
| ALGA0045171         | rs80842500  | 7 | 116217163 | intergenic                 | -5.54189E-10 | 2.1 | ENSSSCG00000052470 (76241), DICER1 (194061)              |
| WU_10.2_7_123365158 | rs330564343 | 7 | 116231882 | intergenic                 | -2.36907E-10 | 2.1 | ENSSSCG00000052470 (90960), DICER1 (179342)              |
| WU_10.2_7_123428303 | rs323468202 | 7 | 116245028 | intergenic                 | -2.96718E-10 | 2.1 | ENSSSCG00000052470 (104106), DICER1<br>(166196)          |
| WU_10.2_7_123439493 | rs325827236 | 7 | 116255475 | intergenic                 | -3.13528E-10 | 2.1 | ENSSSCG00000052470 (114553), DICER1<br>(155749)          |
| WU_10.2_7_123510891 | rs332486098 | 7 | 116267802 | intergenic                 | -4.92004E-10 | 2.1 | ENSSSCG00000052470 (126880), DICER1<br>(143422)          |
| WU_10.2_7_123462504 | rs321955839 | 7 | 116284431 | intergenic                 | -4.57349E-10 | 2.1 | ENSSSCG00000052470 (143509), DICER1<br>(126793)          |
| DRGA0008201         | rs81295354  | 7 | 116364906 | downstream                 | -0.000457025 | 2.1 | ENSSSCG00000052470 (223984), DICER1 (46318)              |
| WU_10.2_7_123606943 | rs332749698 | 7 | 116391085 | intron                     | -0.00042139  | 2   | DICER1                                                   |
| WU_10.2_7_123628307 | rs344132124 | 7 | 116412448 | upstream                   | -0.000383178 | 2   | DICER1 (46646), ENSSSCG00000058870 (17959)               |
| ASGA0036574         | rs81396330  | 7 | 116448075 | non_coding_transcript_exon | -6.31363E-05 | 1.9 | ENSSSCG00000042615                                       |
| MARC0096399         | rs81275736  | 7 | 116458411 | non_coding_transcript_exon | -0.003218372 | 1.9 | ENSSSCG00000057191                                       |
| WU_10.2_8_6092382   | rs327739985 | 8 | 6710408   | intron                     | 5.97339E-14  | 3.8 | CLNK                                                     |
| WU_10.2_8_6106489   | rs333398011 | 8 | 6724514   | intron                     | -9.07196E-07 | 3.8 | CLNK                                                     |
| WU_10.2_8_6125875   | rs319954748 | 8 | 6744237   | intron                     | 2.18373E-07  | 3.8 | CLNK                                                     |
| WU_10.2_8_6146460   | rs328690324 | 8 | 6764825   | intron                     | 9.10017E-10  | 3.8 | CLNK                                                     |
| WU_10.2_8_6159481   | rs81319995  | 8 | 6777847   | intergenic                 | -2.36959E-10 | 3.8 | CLNK (168994), ENSSSCG00000019781 (171784)               |
| WU_10.2_8_6175644   | rs344361676 | 8 | 6794010   | intergenic                 | -1.41529E-12 | 3.8 | CLNK (185157), ENSSSCG00000019781 (155621)               |
| WU_10.2_8_6191745   | rs331315480 | 8 | 6810112   | intergenic                 | -5.7472E-10  | 3.8 | CLNK (201259), ENSSSCG00000019781 (139519)               |
| ASGA0102441         | rs81323760  | 8 | 6828177   | intergenic                 | -2.9748E-09  | 3.8 | CLNK (219324), ENSSSCG00000019781 (121454)               |
| ASGA0037686         | rs81400507  | 8 | 6872552   | intergenic                 | 1.19216E-11  | 3.8 | CLNK (263699), ENSSSCG00000019781 (77079)                |
| WU_10.2_8_6265476   | rs333531017 | 8 | 6883842   | intergenic                 | 0.003419204  | 3.8 | CLNK (274989), ENSSSCG00000019781 (65789)                |
| WU_10.2_8_6282086   | rs328818294 | 8 | 6900448   | intergenic                 | 0.002124428  | 2.8 | CLNK (291595), ENSSSCG00000019781 (49183)                |

|                     |              |    |           |            |              |     |                                                            |
|---------------------|--------------|----|-----------|------------|--------------|-----|------------------------------------------------------------|
| ALGA0046317         | rs81400484   | 8  | 6913947   | intergenic | 0.001154526  | 2.3 | CLNK (305094), ENSSSCG00000019781 (35684)                  |
| WU_10.2_8_6311315   | rs320630523  | 8  | 6929677   | intergenic | 0.003943262  | 2   | CLNK (320824), ENSSSCG00000019781 (19954)                  |
| MARC0091202         | rs81272275   | 8  | 111449788 | intergenic | -2.76833E-05 | 5.9 | ENSSSCG00000052805 (64800),<br>ENSSSCG00000048102 (153834) |
| ASGA0087256         | rs81476824   | 8  | 111464396 | intergenic | 2.62628E-06  | 5.9 | ENSSSCG00000052805 (79408),<br>ENSSSCG00000048102 (139226) |
| WU_10.2_8_119634232 | rs339401102  | 8  | 111517851 | intergenic | -3.04859E-10 | 5.9 | ENSSSCG00000052805 (132863),<br>ENSSSCG00000048102 (85771) |
| WU_10.2_8_119582517 | rs325014808  | 8  | 111569348 | intergenic | 3.26187E-10  | 5.9 | ENSSSCG00000052805 (184360),<br>ENSSSCG00000048102 (34274) |
| ALGA0049192         | rs80883173   | 8  | 111761621 | intron     | 0.004913499  | 5.9 | ENPEP                                                      |
| DIAS0002802         | rs321087883  | 8  | 111782056 | synonymous | 0.004438352  | 3.9 | ENPEP                                                      |
| ALGA0049202         | rs81403466   | 8  | 111899793 | intergenic | 1.37156E-05  | 2.5 | ENSSSCG00000061296 (22637),<br>ENSSSCG00000059739 (61208)  |
| H3GA0035082         | rs81438393   | 12 | 59320767  | intron     | -0.001350146 | 1.8 | NCOR1                                                      |
| ALGA0067282         | rs81438375   | 12 | 59345524  | intron     | -0.001199853 | 2.8 | NCOR1                                                      |
| ALGA0067281         | rs81438369   | 12 | 59360809  | intron     | -0.001199766 | 2.5 | NCOR1                                                      |
| MARC0022618         | rs3473462527 | 12 | 59383668  | intron     | 9.48567E-11  | 2.2 | NCOR1                                                      |
| H3GA0035071         | rs81438351   | 12 | 59392739  | downstream | 3.37503E-10  | 3.1 | NCOR1 (119639), TTC19 (26256)                              |
| H3GA0056745         | rs3471050222 | 12 | 59458957  | intergenic | -0.001458141 | 3.1 | ADORA2B (27444), SPECC1 (195235)                           |
| M1GA0025160         | rs81346733   | 12 | 59461443  | intergenic | 0.001193354  | 2.7 | ADORA2B (29930), SPECC1 (192749)                           |
| M1GA0024295         | rs81332721   | 12 | 59464857  | downstream | 0.001929041  | 2.5 | ADORA2B (33344), SPECC1 (189335)                           |
| ASGA0094328         | rs81313474   | 12 | 59496739  | intron     | 0.001226922  | 2.1 | SPECC1                                                     |
| ASGA0091832         | rs81310434   | 12 | 59503071  | intron     | -1.01791E-11 | 4.3 | SPECC1                                                     |
| ASGA0082073         | rs81329435   | 12 | 59539052  | intron     | 1.46362E-08  | 4.3 | SPECC1                                                     |
| MARC0104547         | rs81280830   | 12 | 59541318  | intron     | 6.64452E-05  | 4.3 | SPECC1                                                     |
| M1GA0027152         | rs81304684   | 12 | 59560760  | intron     | -7.34023E-14 | 4.3 | SPECC1                                                     |
| H3GA0053129         | rs81338548   | 12 | 59563268  | intron     | -2.4048E-15  | 4.3 | SPECC1                                                     |
| ALGA0104388         | rs3473880743 | 12 | 59677731  | intergenic | 0.000977769  | 4.3 | SPECC1 (210940), AKAP10 (111400)                           |
| ALGA0107991         | rs81335837   | 12 | 59749745  | intron     | 2.79241E-13  | 3.9 | AKAP10                                                     |
| ASGA0102677         | rs81324047   | 12 | 59797489  | intergenic | 0.001789455  | 3.9 | AKAP10 (65366), ULK2 (80899)                               |

|                     |              |    |          |                            |              |     |                                                           |
|---------------------|--------------|----|----------|----------------------------|--------------|-----|-----------------------------------------------------------|
| ALGA0114929         | rs81344019   | 12 | 59813764 | intron                     | 0.002474634  | 3.3 | ULK2                                                      |
| ALGA0101633         | rs1110513197 | 12 | 59816448 | intron                     | -7.20534E-09 | 2.4 | ULK2                                                      |
| ALGA0123244         | rs3475085828 | 12 | 59832996 | intron                     | -9.96337E-08 | 2.4 | ULK2                                                      |
| ASGA0092849         | rs81311680   | 12 | 59841644 | intron                     | 0.002474634  | 2.4 | ULK2                                                      |
| 12_62758000         | rs320765022  | 12 | 59850669 | intron                     | 0.002907074  | 1.7 | ULK2                                                      |
| WU_10.2_16_67121359 | rs330273501  | 16 | 61893496 | intergenic                 | 4.38028E-12  | 2.8 | GABRA6 (38028), ENSSSCG00000041732 (84918)                |
| WU_10.2_16_67160369 | rs326989708  | 16 | 61932459 | intergenic                 | -2.46419E-15 | 2.8 | GABRA6 (76991), ENSSSCG00000041732 (45955)                |
| WU_10.2_16_67192252 | rs332293021  | 16 | 61964335 | intergenic                 | -0.000234706 | 2.8 | GABRA6 (108867), ENSSSCG00000041732 (14079)               |
| MARC0012270         | rs81274670   | 16 | 61996687 | intron                     | -8.22578E-06 | 4.2 | GABRB2                                                    |
| WU_10.2_16_67254880 | rs341752931  | 16 | 62026615 | intron                     | -0.000212155 | 4.2 | GABRB2                                                    |
| ALGA0091166         | rs81460896   | 16 | 62049121 | intron                     | -4.12043E-09 | 4.1 | GABRB2                                                    |
| WU_10.2_16_67294713 | rs331465234  | 16 | 62066324 | intron                     | 0.007642582  | 4.1 | GABRB2                                                    |
| H3GA0046863         | rs80906125   | 16 | 62204054 | intron                     | -0.001242286 | 1.6 | GABRB2                                                    |
| H3GA0047915         | rs81465288   | 17 | 12045367 | intron                     | 6.06369E-08  | 1.7 | ENSSSCG00000007004                                        |
| ASGA0075463         | rs81465284   | 17 | 12062356 | intron                     | 3.74967E-13  | 2.2 | ENSSSCG00000007004                                        |
| WU_10.2_17_9746718  | rs340492327  | 17 | 12078075 | intron                     | -0.000139007 | 2.2 | ENSSSCG00000007004                                        |
| ALGA0093288         | rs81465260   | 17 | 12101104 | intergenic                 | 0.000705847  | 2.2 | ENSSSCG00000044174 (13118),<br>ENSSSCG00000044124 (53238) |
| MARC0030380         | rs81224989   | 17 | 12149145 | intron                     | -0.000231872 | 2.4 | ENSSSCG00000044124                                        |
| ASGA0075444         | rs81465216   | 17 | 12196160 | downstream                 | -7.04026E-12 | 2.4 | ENSSSCG00000054385 (17943),<br>ENSSSCG00000057786 (4142)  |
| H3GA0056000         | rs81318643   | 17 | 12203390 | non_coding_transcript_exon | -2.00149E-05 | 2.4 | ENSSSCG00000050111                                        |
| ALGA0103930         | rs81330993   | 17 | 12208959 | non_coding_transcript_exon | -0.000217364 | 2.4 | ENSSSCG00000053036                                        |
| WU_10.2_17_9948917  | rs321561826  | 17 | 12231242 | non_coding_transcript_exon | 0.001147339  | 2.3 | ENSSSCG00000050358                                        |
| ALGA0093251         | rs80805260   | 17 | 12246865 | upstream                   | 5.60891E-13  | 2   | ENSSSCG00000053983 (9259),<br>ENSSSCG00000049959 (28173)  |
| MARC0073651         | rs80990714   | 17 | 12267480 | upstream                   | -0.000476289 | 2   | ENSSSCG00000053983 (29874),<br>ENSSSCG00000049959 (7558)  |
| WU_10.2_17_10016145 | rs330330568  | 17 | 12290972 | upstream                   | -0.000346484 | 2   | ENSSSCG00000049959 (21001),<br>ENSSSCG00000043573 (6477)  |
| ASGA0075438         | rs80926773   | 17 | 12314493 | non_coding_transcript_exon | -0.004434238 | 1.9 | ENSSSCG00000053635                                        |

|                     |             |    |          |            |              |     |                                                              |
|---------------------|-------------|----|----------|------------|--------------|-----|--------------------------------------------------------------|
| WU_10.2_17_47439537 | rs341429033 | 17 | 41963261 | intron     | 4.10218E-12  | 3.3 | DHX35                                                        |
| H3GA0049067         | rs80839500  | 17 | 41992643 | intergenic | 1.05071E-09  | 3.3 | DHX35 (91969), ENSSSCG00000052330 (31817)                    |
| H3GA0049069         | rs80947840  | 17 | 42004893 | intergenic | 1.05375E-08  | 3.3 | DHX35 (104219), ENSSSCG00000052330 (19567)                   |
| ASGA0077089         | rs80893851  | 17 | 42041944 | intergenic | -3.22364E-10 | 3.3 | ENSSSCG00000052330 (22816),<br>ENSSSCG00000059132 (1171945)  |
| WU_10.2_17_47551924 | rs335477633 | 17 | 42050589 | intergenic | 9.17533E-09  | 3.3 | ENSSSCG00000052330 (31461),<br>ENSSSCG00000059132 (1163300)  |
| ALGA0123517         | rs81321389  | 17 | 42088366 | intergenic | -4.54524E-11 | 3.3 | ENSSSCG00000052330 (69238),<br>ENSSSCG00000059132 (1125523)  |
| ALGA0115746         | rs81345071  | 17 | 42094505 | intergenic | -4.27215E-10 | 3.3 | ENSSSCG00000052330 (75377),<br>ENSSSCG00000059132 (1119384)  |
| WU_10.2_17_47607350 | rs324518159 | 17 | 42106145 | intergenic | 4.55665E-14  | 3.3 | ENSSSCG00000052330 (87017),<br>ENSSSCG00000059132 (1107744)  |
| MARC0030914         | rs81223926  | 17 | 42139020 | intergenic | -1.03371E-09 | 5.1 | ENSSSCG00000052330 (119892),<br>ENSSSCG00000059132 (1074869) |
| WU_10.2_17_47660553 | rs329873968 | 17 | 42159212 | intergenic | 6.65328E-17  | 6.1 | ENSSSCG00000052330 (140084),<br>ENSSSCG00000059132 (1054677) |
| WU_10.2_17_47706743 | rs328557833 | 17 | 42205215 | intergenic | -0.001929919 | 6.2 | ENSSSCG00000052330 (186087),<br>ENSSSCG00000059132 (1008674) |
| WU_10.2_17_47726361 | rs319285946 | 17 | 42224736 | intergenic | -3.71419E-14 | 5.3 | ENSSSCG00000052330 (205608),<br>ENSSSCG00000059132 (989153)  |
| WU_10.2_17_47838187 | rs327193499 | 17 | 42337026 | intergenic | -2.02618E-18 | 5.6 | ENSSSCG00000052330 (317898),<br>ENSSSCG00000059132 (876863)  |
| ASGA0105916         | rs81306152  | 17 | 42384529 | intergenic | -0.002357563 | 5.6 | ENSSSCG00000052330 (365401),<br>ENSSSCG00000059132 (829360)  |
| WU_10.2_17_47939784 | rs321435842 | 17 | 42438628 | intergenic | 0.004743875  | 4.6 | ENSSSCG00000052330 (419500),<br>ENSSSCG00000059132 (775261)  |
| WU_10.2_17_47961469 | rs324568734 | 17 | 42460314 | intergenic | -0.003761393 | 3.1 | ENSSSCG00000052330 (441186),<br>ENSSSCG00000059132 (753575)  |
| MARC0046530         | rs81237579  | 17 | 42475688 | intergenic | -0.004767463 | 2   | ENSSSCG00000052330 (456560),<br>ENSSSCG00000059132 (738201)  |
| MARC0043409         | rs81236332  | 18 | 4068201  | intergenic | 4.40447E-07  | 2.1 | DPP6 (919718), ENSSSCG00000042794 (461571)                   |
| WU_10.2_18_4338795  | rs323156321 | 18 | 4146336  | intergenic | -4.61669E-08 | 2.5 | DPP6 (997853), ENSSSCG00000042794 (383436)                   |
| ASGA0104044         | rs81303945  | 18 | 4195580  | intergenic | 5.45778E-06  | 2.5 | DPP6 (1047097), ENSSSCG00000042794 (334192)                  |
| ASGA0100463         | rs81321238  | 18 | 4224596  | intergenic | -7.41321E-14 | 2.5 | DPP6 (1076113), ENSSSCG00000042794 (305176)                  |
| WU_10.2_18_4437222  | rs328805423 | 18 | 4246811  | intergenic | 4.92362E-10  | 2.5 | DPP6 (1098328), ENSSSCG00000042794 (282961)                  |
| WU_10.2_18_4462931  | rs344227291 | 18 | 4271505  | intergenic | 3.3585E-15   | 2.5 | DPP6 (1123022), ENSSSCG00000042794 (258267)                  |
| WU_10.2_18_4485274  | rs326167881 | 18 | 4295878  | intergenic | 0.000981217  | 2.5 | DPP6 (1147395), ENSSSCG00000042794 (233894)                  |

|                    |             |    |         |            |              |     |                                                           |
|--------------------|-------------|----|---------|------------|--------------|-----|-----------------------------------------------------------|
| ASGA0082264        | rs81479433  | 18 | 4317527 | intergenic | -2.4243E-05  | 2.2 | DPP6 (1169044), ENSSSCG00000042794 (212245)               |
| WU_10.2_18_4519592 | rs327464983 | 18 | 4330182 | intergenic | 1.18731E-10  | 2.2 | DPP6 (1181699), ENSSSCG00000042794 (199590)               |
| ASGA0099518        | rs81320033  | 18 | 4366119 | intergenic | 1.02755E-05  | 2.2 | DPP6 (1217636), ENSSSCG00000042794 (163653)               |
| WU_10.2_18_4586954 | rs341567333 | 18 | 4399265 | intergenic | -0.001570039 | 2.2 | DPP6 (1250782), ENSSSCG00000042794 (130507)               |
| ASGA0090699        | rs81309073  | 18 | 4433333 | intergenic | -2.5336E-10  | 1.9 | DPP6 (1284850), ENSSSCG00000042794 (96439)                |
| ASGA0084020        | rs81340828  | 18 | 4440434 | intergenic | 3.13944E-08  | 1.9 | DPP6 (1291951), ENSSSCG00000042794 (89338)                |
| ALGA0119307        | rs81326437  | 18 | 4453405 | intergenic | 1.33326E-13  | 1.9 | DPP6 (1304922), ENSSSCG00000042794 (76367)                |
| H3GA0056437        | rs81324290  | 18 | 4468276 | intergenic | 1.333E-13    | 1.9 | DPP6 (1319793), ENSSSCG00000042794 (61496)                |
| ASGA0095228        | rs81314564  | 18 | 4469780 | downstream | 3.14292E-13  | 1.9 | DPP6 (1321297), ENSSSCG00000042794 (59992)                |
| MARC0044433        | rs81236859  | 18 | 4474319 | downstream | 1.92406E-08  | 1.9 | DPP6 (1325836), ENSSSCG00000042794 (55453)                |
| WU_10.2_18_4691045 | rs333666929 | 18 | 4502879 | intron     | 8.12823E-09  | 1.9 | ENSSSCG00000042794                                        |
| ALGA0115679        | rs81344984  | 18 | 4516477 | intron     | -1.84705E-08 | 1.9 | ENSSSCG00000042794                                        |
| ASGA0097549        | rs81317538  | 18 | 4522341 | intron     | -1.69901E-08 | 1.9 | ENSSSCG00000042794                                        |
| ASGA0097549        | rs81317538  | 18 | 4522341 | intron     | -1.69901E-08 | 1.9 | ENSSSCG00000042794                                        |
| WU_10.2_18_4727355 | rs337165001 | 18 | 4538602 | intergenic | 0.002435025  | 1.9 | ENSSSCG00000042794 (64108),<br>ENSSSCG00000040865 (48677) |
